# Supplementary material
Source: PubMed Central journal article supplement (PMC6143113)
Supplement: jamaneurol-75-1055-s001.pdf [file jamaneurol-75-1055-s001.pdf]

## Supplementary Online Content

Barnes DE, Byers AL, Gardner RC, Seal KH, Boscardin WJ, Yaffe K. Association of mild traumatic brain injury with and without loss of consciousness with dementia in US military veterans. Published online May 7, 2018. *JAMA Neurol*. doi:10.1001/jamaneurol.2018.0815.

**eAppendix 1.** Traumatic Brain Injury (TBI) Severity Case Definitions.

**eAppendix 2.** Traumatic Brain Injury (TBI) Severity Classification Using Modified Defense and Veterans Brain Injury Center (DVBIC) 2012 ICD-9 Diagnostic Code List.

**eAppendix 3.** Dementia ICD-9 Diagnostic Code List.

**eTable.** Traumatic Brain Injury Case Distribution.

This supplementary material has been provided by the authors to give readers additional information about their work.

**eAppendix 1. Traumatic Brain Injury (TBI) Severity Case Definitions**

| Data Source  | TBI Severity                                                |                                                                       |                                                                |                                                         |
|--------------|-------------------------------------------------------------|-----------------------------------------------------------------------|----------------------------------------------------------------|---------------------------------------------------------|
|              | Mild, Without LOC                                           | Mild, With LOC                                                        | Mild, LOC Unknown                                              | Moderate/Severe                                         |
| <b>CTBIE</b> | LOC = 0;<br>AOC = a moment to 24 hrs;<br>AND PTA 0 to 1 day | LOC > 0 to 30 min;<br>AOC = a moment to 24 hrs;<br>AND PTA 0 to 1 day | N/A                                                            | LOC > 30 min;<br>AOC > 24 hours;<br>OR PTA > 1 day      |
| <b>NPCD</b>  | Mild TBI (ICD-9 codes);<br>AND LOC = 0                      | Mild TBI (ICD-9 codes);<br>AND LOC = brief (< 1 hr)                   | Mild TBI (ICD-9 codes);<br>AND LOC = unknown<br>or unspecified | Moderate, Severe or<br>Penetrating TBI (ICD-9<br>codes) |

CTBIE, Comprehensive Traumatic Brain Injury Evaluation; AOC, alteration of consciousness; ICD-9, International Classification of Diseases – 9<sup>th</sup> edition; LOC, loss of consciousness; NPCD, National Patient Care Database; PTA, post-traumatic amnesia. Specific ICD-9 codes are from the Defense and Veterans Brain Injury Center (DVBIC) 2012 criteria and are listed in Appendix 3.

**eAppendix 2. Traumatic Brain Injury (TBI) Severity Classification Using Modified Defense and Veterans Brain Injury Center (DVBIC) 2012 ICD-9 Diagnostic Code List**

| ICD-9  | Description                                                                                                                                                 | DVBIC 2012 Severity Classification | CENC Severity Classification |
|--------|-------------------------------------------------------------------------------------------------------------------------------------------------------------|------------------------------------|------------------------------|
| 310.2  | Postconcussion Syndrome                                                                                                                                     | Mild                               | Mild, LOC<br>unknown         |
| 800.0  | <b>closed fracture of vault of skull w/o mention of intracranial injury</b>                                                                                 | n/a                                | n/a                          |
| 800.00 | closed fracture of vault of skull w/o mention of intracranial injury w/state of consciousness unspecified                                                   | Mild                               | Mild, LOC<br>unknown         |
| 800.01 | closed fracture of vault of skull w/o mention of intracranial injury w/o LOC                                                                                | Mild                               | Mild, no LOC                 |
| 800.02 | closed fracture of vault of skull w/o mention of intracranial injury w/brief (< 1 hr) LOC                                                                   | Mild                               | Mild, LOC                    |
| 800.03 | closed fracture of vault of skull w/o mention of intracranial injury w/moderate (1-24 hrs) LOC                                                              | Moderate                           | Mod/Sev                      |
| 800.04 | closed fracture of vault of skull w/o mention of intracranial injury w/prolonged (> 24 hrs) LOC and return to pre-existing conscious level                  | Severe                             | Mod/Sev                      |
| 800.05 | closed fracture of vault of skull w/o mention of intracranial injury w/prolonged (>24 hrs) LOC w/o return to pre-existing conscious level                   | Severe                             | Mod/Sev                      |
| 800.06 | closed fracture of vault of skull w/o mention of intracranial injury w/LOC of unspecified duration                                                          | Mild                               | Mild, LOC<br>Mild, LOC       |
| 800.09 | closed fracture of vault of skull w/o mention of intracranial injury w/concussion unspecified                                                               | Mild                               | unknown                      |
| 800.1  | <b>closed fracture of vault of skull with cerebral laceration and contusion</b>                                                                             | n/a                                | n/a                          |
| 800.10 | closed fracture of vault of skull with cerebral laceration and contusion w/state of consciousness unspecified                                               | Moderate                           | Mod/Sev                      |
| 800.11 | closed fracture of vault of skull with cerebral laceration and contusion w/o LOC                                                                            | Moderate                           | Mod/Sev                      |
| 800.12 | closed fracture of vault of skull with cerebral laceration and contusion w/brief (<1 hr) LOC                                                                | Moderate                           | Mod/Sev                      |
| 800.13 | closed fracture of vault of skull with cerebral laceration and contusion w/moderate (1-24 hrs) LOC                                                          | Moderate                           | Mod/Sev                      |
| 800.14 | closed fracture of vault of skull with cerebral laceration and contusion w/prolonged (>24 hrs) LOC and return to pre-existing conscious level               | Severe                             | Mod/Sev                      |
| 800.15 | closed fracture of vault of skull with cerebral laceration and contusion w/prolonged (>24 hrs) LOC w/o return to pre-existing conscious level               | Severe                             | Mod/Sev                      |
| 800.16 | closed fracture of vault of skull with cerebral laceration and contusion w/LOC of unspecified duration                                                      | Moderate                           | Mod/Sev                      |
| 800.19 | closed fracture of vault of skull with cerebral laceration and contusion w/concussion unspecified                                                           | Moderate                           | Mod/Sev                      |
| 800.2  | <b>closed fracture of vault of skull with subarachnoid subdural and extradural hemorrhage</b>                                                               | n/a                                | n/a                          |
| 800.20 | closed fracture of vault of skull with subarachnoid subdural and extradural hemorrhage w/state of consciousness unspecified                                 | Moderate                           | Mod/Sev                      |
| 800.21 | closed fracture of vault of skull with subarachnoid subdural and extradural hemorrhage w/o LOC                                                              | Moderate                           | Mod/Sev                      |
| 800.22 | closed fracture of vault of skull with subarachnoid subdural and extradural hemorrhage w/brief (<1 hr) LOC                                                  | Moderate                           | Mod/Sev                      |
| 800.23 | closed fracture of vault of skull with subarachnoid subdural and extradural hemorrhage w/moderate (1-24 hrs) LOC                                            | Moderate                           | Mod/Sev                      |
| 800.24 | closed fracture of vault of skull with subarachnoid subdural and extradural hemorrhage w/prolonged (>24 hrs) LOC and return to pre-existing conscious level | Severe                             | Mod/Sev                      |
| 800.25 | closed fracture of vault of skull with subarachnoid subdural and extradural hemorrhage w/prolonged (>24 hrs) LOC w/o return to pre-existing conscious level | Severe                             | Mod/Sev                      |
| 800.26 | closed fracture of vault of skull with subarachnoid subdural and extradural hemorrhage w/LOC of unspecified duration                                        | Moderate                           | Mod/Sev                      |
| 800.29 | closed fracture of vault of skull with subarachnoid subdural and extradural hemorrhage w/concussion unspecified                                             | Moderate                           | Mod/Sev                      |

|        |                                                                                                                                                                 |             |                   |
|--------|-----------------------------------------------------------------------------------------------------------------------------------------------------------------|-------------|-------------------|
| 800.3  | <b>closed fracture of vault of skull with other and unspecified intracranial hemorrhage</b>                                                                     | n/a         | n/a               |
| 800.30 | closed fracture of vault of skull with other and unspecified intracranial hemorrhage w/state of consciousness unspecified                                       | Moderate    | Mod/Sev           |
| 800.31 | closed fracture of vault of skull with other and unspecified intracranial hemorrhage w/o LOC                                                                    | Moderate    | Mod/Sev           |
| 800.32 | closed fracture of vault of skull with other and unspecified intracranial hemorrhage w/brief (<1 hr) LOC                                                        | Moderate    | Mod/Sev           |
| 800.33 | closed fracture of vault of skull with other and unspecified intracranial hemorrhage w/moderate (1-24 hrs) LOC                                                  | Moderate    | Mod/Sev           |
| 800.34 | closed fracture of vault of skull with other and unspecified intracranial hemorrhage w/prolonged (>24 hrs) LOC and return to pre-existing conscious level       | Severe      | Mod/Sev           |
| 800.35 | closed fracture of vault of skull with other and unspecified intracranial hemorrhage w/prolonged (>24 hrs) LOC w/o return to pre-existing conscious level       | Severe      | Mod/Sev           |
| 800.36 | closed fracture of vault of skull with other and unspecified intracranial hemorrhage w/LOC of unspecified duration                                              | Moderate    | Mod/Sev           |
| 800.39 | closed fracture of vault of skull with other and unspecified intracranial hemorrhage w/concussion unspecified                                                   | Moderate    | Mod/Sev           |
| 800.4  | <b>closed fracture of vault of skull with intracranial injury of other and unspecified nature</b>                                                               | n/a         | n/a               |
| 800.40 | closed fracture of vault of skull with intracranial injury of other and unspecified nature w/state of consciousness unspecified                                 | Moderate    | Mod/Sev           |
| 800.41 | closed fracture of vault of skull with intracranial injury of other and unspecified nature w/o LOC                                                              | Moderate    | Mod/Sev           |
| 800.42 | closed fracture of vault of skull with intracranial injury of other and unspecified nature w/brief (<1 hr) LOC                                                  | Moderate    | Mod/Sev           |
| 800.43 | closed fracture of vault of skull with intracranial injury of other and unspecified nature w/moderate (1-24 hrs) LOC                                            | Moderate    | Mod/Sev           |
| 800.44 | closed fracture of vault of skull with intracranial injury of other and unspecified nature w/prolonged (>24 hrs) LOC and return to pre-existing conscious level | Severe      | Mod/Sev           |
| 800.45 | closed fracture of vault of skull with intracranial injury of other and unspecified nature w/prolonged (>24 hrs) LOC w/o return to pre-existing conscious level | Severe      | Mod/Sev           |
| 800.46 | closed fracture of vault of skull with intracranial injury of other and unspecified nature w/LOC of unspecified duration                                        | Moderate    | Mod/Sev           |
| 800.49 | closed fracture of vault of skull with intracranial injury of other and unspecified nature w/concussion unspecified                                             | Moderate    | Mod/Sev           |
| 800.5  | <b>open fracture of vault of skull w/o mention of intracranial injury</b>                                                                                       | n/a         | n/a               |
| 800.50 | open fracture of vault of skull w/o mention of intracranial injury w/state of consciousness unspecified                                                         | Mild        | Mild, LOC unknown |
| 800.51 | open fracture of vault of skull w/o mention of intracranial injury w/o LOC                                                                                      | Mild        | Mild, no LOC      |
| 800.52 | open fracture of vault of skull w/o mention of intracranial injury w/brief (<1 hr) LOC                                                                          | Mild        | Mild, LOC         |
| 800.53 | open fracture of vault of skull w/o mention of intracranial injury w/moderate (1-24 hrs) LOC                                                                    | Moderate    | Mod/Sev           |
| 800.54 | open fracture of vault of skull w/o mention of intracranial injury w/prolonged (>24 hrs) LOC and return to pre-existing conscious level                         | Severe      | Mod/Sev           |
| 800.55 | open fracture of vault of skull w/o mention of intracranial injury w/prolonged (>24 hrs) LOC w/o return to pre-existing conscious level                         | Severe      | Mod/Sev           |
| 800.56 | open fracture of vault of skull w/o mention of intracranial injury w/LOC of unspecified duration                                                                | Moderate    | Mod/Sev           |
| 800.59 | open fracture of vault of skull w/o mention of intracranial injury w/concussion unspecified                                                                     | Moderate    | Mod/Sev           |
| 800.6  | <b>open fracture of vault of skull with cerebral laceration and contusion</b>                                                                                   | n/a         | n/a               |
| 800.60 | open fracture of vault of skull with cerebral laceration and contusion w/state of consciousness unspecified                                                     | Penetrating | Mod/Sev           |
| 800.61 | open fracture of vault of skull with cerebral laceration and contusion w/o LOC                                                                                  | Penetrating | Mod/Sev           |

|        |                                                                                                                                                                  |             |         |
|--------|------------------------------------------------------------------------------------------------------------------------------------------------------------------|-------------|---------|
| 800.62 | open fracture of vault of skull with cerebral laceration and contusion w/brief (<1 hr) LOC                                                                       | Penetrating | Mod/Sev |
| 800.63 | open fracture of vault of skull with cerebral laceration and contusion w/moderate (1-24 hrs) LOC                                                                 | Penetrating | Mod/Sev |
| 800.64 | open fracture of vault of skull with cerebral laceration and contusion w/prolonged (>24 hrs) LOC and return to pre-existing conscious level                      | Penetrating | Mod/Sev |
| 800.65 | open fracture of vault of skull with cerebral laceration and contusion w/prolonged (>24 hrs) LOC w/o return to pre-existing conscious level                      | Penetrating | Mod/Sev |
| 800.66 | open fracture of vault of skull with cerebral laceration and contusion w/LOC of unspecified duration                                                             | Penetrating | Mod/Sev |
| 800.69 | open fracture of vault of skull with cerebral laceration and contusion w/concussion unspecified                                                                  | Penetrating | Mod/Sev |
| 800.7  | <b>open fracture of vault of skull with subarachnoid subdural and extradural hemorrhage</b>                                                                      | n/a         | n/a     |
| 800.70 | open fracture of vault of skull with subarachnoid subdural and extradural hemorrhage w/state of consciousness unspecified                                        | Penetrating | Mod/Sev |
| 800.71 | open fracture of vault of skull with subarachnoid subdural and extradural hemorrhage w/o LOC                                                                     | Penetrating | Mod/Sev |
| 800.72 | open fracture of vault of skull with subarachnoid subdural and extradural hemorrhage w/brief (<1 hr) LOC                                                         | Penetrating | Mod/Sev |
| 800.73 | open fracture of vault of skull with subarachnoid subdural and extradural hemorrhage w/moderate (1-24 hrs) LOC                                                   | Penetrating | Mod/Sev |
| 800.74 | open fracture of vault of skull with subarachnoid subdural and extradural hemorrhage w/prolonged (>24 hrs) LOC and return to pre-existing conscious level        | Penetrating | Mod/Sev |
| 800.75 | open fracture of vault of skull with subarachnoid subdural and extradural hemorrhage w/prolonged (>24 hrs) LOC w/o return to pre-existing conscious level        | Penetrating | Mod/Sev |
| 800.76 | open fracture of vault of skull with subarachnoid subdural and extradural hemorrhage w/LOC of unspecified duration                                               | Penetrating | Mod/Sev |
| 800.79 | open fracture of vault of skull with subarachnoid subdural and extradural hemorrhage w/concussion unspecified                                                    | Penetrating | Mod/Sev |
| 800.8  | <b>open fracture of vault of skull with other and unspecified intracranial hemorrhage</b>                                                                        | n/a         | n/a     |
| 800.80 | open fracture of vault of skull with other and unspecified intracranial hemorrhage w/state of consciousness unspecified                                          | Penetrating | Mod/Sev |
| 800.81 | open fracture of vault of skull with other and unspecified intracranial hemorrhage w/o LOC                                                                       | Penetrating | Mod/Sev |
| 800.82 | open fracture of vault of skull with other and unspecified intracranial hemorrhage w/brief (<1 hr) LOC                                                           | Penetrating | Mod/Sev |
| 800.83 | open fracture of vault of skull with other and unspecified intracranial hemorrhage w/moderate (1-24 hrs) LOC                                                     | Penetrating | Mod/Sev |
| 800.84 | open fracture of vault of skull with other and unspecified intracranial hemorrhage w/prolonged (More Than 24 hrs) LOC and return to pre-existing conscious level | Penetrating | Mod/Sev |
| 800.85 | open fracture of vault of skull with other and unspecified intracranial hemorrhage w/prolonged (>24 hrs) LOC w/o return to pre-existing conscious level          | Penetrating | Mod/Sev |
| 800.86 | open fracture of vault of skull with other and unspecified intracranial hemorrhage w/LOC of unspecified duration                                                 | Penetrating | Mod/Sev |
| 800.89 | open fracture of vault of skull with other and unspecified intracranial hemorrhage w/concussion unspecified                                                      | Penetrating | Mod/Sev |
| 800.9  | <b>open fracture of vault of skull with intracranial injury of other and unspecified nature</b>                                                                  | n/a         | n/a     |
| 800.90 | open fracture of vault of skull with intracranial injury of other and unspecified nature w/state of consciousness unspecified                                    | Penetrating | Mod/Sev |
| 800.91 | open fracture of vault of skull with intracranial injury of other and unspecified nature w/o LOC                                                                 | Penetrating | Mod/Sev |
| 800.92 | open fracture of vault of skull with intracranial injury of other and unspecified nature w/brief (<1 hr) LOC                                                     | Penetrating | Mod/Sev |
| 800.93 | open fracture of vault of skull with intracranial injury of other and unspecified nature                                                                         | Penetrating | Mod/Sev |

|        |                                                                                                                                                                                                               |             |                                   |
|--------|---------------------------------------------------------------------------------------------------------------------------------------------------------------------------------------------------------------|-------------|-----------------------------------|
| 800.94 | unspecified nature w/moderate (1-24 hrs) LOC<br>open fracture of vault of skull with intracranial injury of other and unspecified nature w/prolonged (>24 hrs) LOC and return to pre-existing conscious level | Penetrating | Mod/Sev                           |
| 800.95 | open fracture of vault of skull with intracranial injury of other and unspecified nature w/prolonged (>24 hrs) LOC w/o return to pre-existing conscious level                                                 | Penetrating | Mod/Sev                           |
| 800.96 | open fracture of vault of skull with intracranial injury of other and unspecified nature w/LOC of unspecified duration                                                                                        | Penetrating | Mod/Sev                           |
| 800.99 | open fracture of vault of skull with intracranial injury of other and unspecified nature w/concussion unspecified                                                                                             | Penetrating | Mod/Sev                           |
| 801.0  | <b>closed fracture of base of skull w/o mention of intracranial injury</b>                                                                                                                                    | n/a         | n/a                               |
| 801.00 | closed fracture of base of skull w/o mention of intracranial injury w/state of consciousness unspecified                                                                                                      | Mild        | Mild, LOC<br>unknown              |
| 801.01 | closed fracture of base of skull w/o mention of intracranial injury w/o LOC                                                                                                                                   | Mild        | Mild, no LOC                      |
| 801.02 | closed fracture of base of skull w/o mention of intracranial injury w/brief (<1 hr) LOC                                                                                                                       | Mild        | Mild, LOC                         |
| 801.03 | closed fracture of base of skull w/o mention of intracranial injury w/moderate (1-24 hrs) LOC                                                                                                                 | Moderate    | Mod/Sev                           |
| 801.04 | closed fracture of base of skull w/o mention of intracranial injury w/prolonged (>24 hrs) LOC and return to pre-existing conscious level                                                                      | Severe      | Mod/Sev                           |
| 801.05 | closed fracture of base of skull w/o mention of intracranial injury w/prolonged (>24 hrs) LOC w/o return to pre-existing conscious level                                                                      | Severe      | Mod/Sev                           |
| 801.06 | closed fracture of base of skull w/o mention of intracranial injury w/LOC of unspecified duration                                                                                                             | Mild        | Mild, LOC<br>Mild, LOC<br>unknown |
| 801.09 | closed fracture of base of skull w/o mention of intracranial injury w/concussion unspecified                                                                                                                  | Mild        | unknown                           |
| 801.1  | <b>closed fracture of base of skull with cerebral laceration and contusion</b>                                                                                                                                | n/a         | n/a                               |
| 801.10 | closed fracture of base of skull with cerebral laceration and contusion w/state of consciousness unspecified                                                                                                  | Moderate    | Mod/Sev                           |
| 801.11 | closed fracture of base of skull with cerebral laceration and contusion w/o LOC                                                                                                                               | Moderate    | Mod/Sev                           |
| 801.12 | closed fracture of base of skull with cerebral laceration and contusion w/brief (<1 hr) LOC                                                                                                                   | Moderate    | Mod/Sev                           |
| 801.13 | closed fracture of base of skull with cerebral laceration and contusion w/moderate (1-24 hrs) LOC                                                                                                             | Moderate    | Mod/Sev                           |
| 801.14 | closed fracture of base of skull with cerebral laceration and contusion w/prolonged (>24 hrs) LOC and return to pre-existing conscious level                                                                  | Severe      | Mod/Sev                           |
| 801.15 | closed fracture of base of skull with cerebral laceration and contusion w/prolonged (>24 hrs) LOC w/o return to pre-existing conscious level                                                                  | Severe      | Mod/Sev                           |
| 801.16 | closed fracture of base of skull with cerebral laceration and contusion w/LOC of unspecified duration                                                                                                         | Moderate    | Mod/Sev                           |
| 801.19 | closed fracture of base of skull with cerebral laceration and contusion w/concussion unspecified                                                                                                              | Moderate    | Mod/Sev                           |
| 801.2  | <b>closed fracture of base of skull with subarachnoid subdural and extradural hemorrhage</b>                                                                                                                  | n/a         | n/a                               |
| 801.20 | closed fracture of base of skull with subarachnoid subdural and extradural hemorrhage w/state of consciousness unspecified                                                                                    | Moderate    | Mod/Sev                           |
| 801.21 | closed fracture of base of skull with subarachnoid subdural and extradural hemorrhage w/o LOC                                                                                                                 | Moderate    | Mod/Sev                           |
| 801.22 | closed fracture of base of skull with subarachnoid subdural and extradural hemorrhage w/brief (<1 hr) LOC                                                                                                     | Moderate    | Mod/Sev                           |
| 801.23 | closed fracture of base of skull with subarachnoid subdural and extradural hemorrhage w/moderate (1-24 hrs) LOC                                                                                               | Moderate    | Mod/Sev                           |
| 801.24 | closed fracture of base of skull with subarachnoid subdural and extradural hemorrhage w/prolonged (>24 hrs) LOC and return to pre-existing conscious level                                                    | Severe      | Mod/Sev                           |
| 801.25 | closed fracture of base of skull with subarachnoid subdural and extradural hemorrhage w/prolonged (>24 hrs) LOC w/o return to pre-existing conscious level                                                    | Severe      | Mod/Sev                           |

|        |                                                                                                                                                                |          |                   |
|--------|----------------------------------------------------------------------------------------------------------------------------------------------------------------|----------|-------------------|
| 801.26 | closed fracture of base of skull with subarachnoid subdural and extradural hemorrhage w/LOC of unspecified duration                                            | Moderate | Mod/Sev           |
| 801.29 | closed fracture of base of skull with subarachnoid subdural and extradural hemorrhage w/concussion unspecified                                                 | Moderate | Mod/Sev           |
| 801.3  | <b>closed fracture of base of skull with other and unspecified intracranial hemorrhage</b>                                                                     | n/a      | n/a               |
| 801.30 | closed fracture of base of skull with other and unspecified intracranial hemorrhage w/state of consciousness unspecified                                       | Moderate | Mod/Sev           |
| 801.31 | closed fracture of base of skull with other and unspecified intracranial hemorrhage w/o LOC                                                                    | Moderate | Mod/Sev           |
| 801.32 | closed fracture of base of skull with other and unspecified intracranial hemorrhage w/brief (<1 hr) LOC                                                        | Moderate | Mod/Sev           |
| 801.33 | closed fracture of base of skull with other and unspecified intracranial hemorrhage w/moderate (1-24 hrs) LOC                                                  | Moderate | Mod/Sev           |
| 801.34 | closed fracture of base of skull with other and unspecified intracranial hemorrhage w/prolonged (>24 hrs) LOC and return to pre-existing conscious level       | Severe   | Mod/Sev           |
| 801.35 | closed fracture of base of skull with other and unspecified intracranial hemorrhage w/prolonged (>24 hrs) LOC w/o return to pre-existing conscious level       | Severe   | Mod/Sev           |
| 801.36 | closed fracture of base of skull with other and unspecified intracranial hemorrhage w/LOC of unspecified duration                                              | Moderate | Mod/Sev           |
| 801.39 | closed fracture of base of skull with other and unspecified intracranial hemorrhage w/concussion unspecified                                                   | Moderate | Mod/Sev           |
| 801.4  | <b>closed fracture of base of skull with intracranial injury of other and unspecified nature</b>                                                               | n/a      | n/a               |
| 801.40 | closed fracture of base of skull with intracranial injury of other and unspecified nature w/state of consciousness unspecified                                 | Moderate | Mod/Sev           |
| 801.41 | closed fracture of base of skull with intracranial injury of other and unspecified nature w/o LOC                                                              | Moderate | Mod/Sev           |
| 801.42 | closed fracture of base of skull with intracranial injury of other and unspecified nature w/brief (<1 hr) LOC                                                  | Moderate | Mod/Sev           |
| 801.43 | closed fracture of base of skull with intracranial injury of other and unspecified nature w/moderate (1-24 hrs) LOC                                            | Moderate | Mod/Sev           |
| 801.44 | closed fracture of base of skull with intracranial injury of other and unspecified nature w/prolonged (>24 hrs) LOC and return to pre-existing conscious level | Severe   | Mod/Sev           |
| 801.45 | closed fracture of base of skull with intracranial injury of other and unspecified nature w/prolonged (>24 hrs) LOC w/o return to pre-existing conscious level | Severe   | Mod/Sev           |
| 801.46 | closed fracture of base of skull with intracranial injury of other and unspecified nature w/LOC of unspecified duration                                        | Moderate | Mod/Sev           |
| 801.49 | closed fracture of base of skull with intracranial injury of other and unspecified nature w/concussion unspecified                                             | Moderate | Mod/Sev           |
| 801.5  | <b>open fracture of base of skull w/o mention of intracranial injury</b>                                                                                       | n/a      | n/a               |
| 801.50 | open fracture of base of skull w/o mention of intracranial injury w/state of consciousness unspecified                                                         | Mild     | Mild, LOC unknown |
| 801.51 | open fracture of base of skull w/o mention of intracranial injury w/o LOC                                                                                      | Mild     | Mild, no LOC      |
| 801.52 | open fracture of base of skull w/o mention of intracranial injury w/brief (<1 hr) LOC                                                                          | Mild     | Mild, LOC         |
| 801.53 | open fracture of base of skull w/o mention of intracranial injury w/moderate (1-24 hrs) LOC                                                                    | Moderate | Mod/Sev           |
| 801.54 | open fracture of base of skull w/o mention of intracranial injury w/prolonged (>24 hrs) LOC and return to pre-existing conscious level                         | Severe   | Mod/Sev           |
| 801.55 | open fracture of base of skull w/o mention of intracranial injury w/prolonged (>24 hrs) LOC w/o return to pre-existing conscious level                         | Severe   | Mod/Sev           |
| 801.56 | open fracture of base of skull w/o mention of intracranial injury w/LOC of unspecified duration                                                                | Moderate | Mod/Sev           |
| 801.59 | open fracture of base of skull w/o mention of intracranial injury w/concussion unspecified                                                                     | Moderate | Mod/Sev           |
| 801.6  | <b>open fracture of base of skull with cerebral laceration and contusion</b>                                                                                   | n/a      | n/a               |

|        |                                                                                                                                                          |             |         |
|--------|----------------------------------------------------------------------------------------------------------------------------------------------------------|-------------|---------|
| 801.60 | open fracture of base of skull with cerebral laceration and contusion w/state of consciousness unspecified                                               | Penetrating | Mod/Sev |
| 801.61 | open fracture of base of skull with cerebral laceration and contusion w/o LOC                                                                            | Penetrating | Mod/Sev |
| 801.62 | open fracture of base of skull with cerebral laceration and contusion w/brief (<1 hr) LOC                                                                | Penetrating | Mod/Sev |
| 801.63 | open fracture of base of skull with cerebral laceration and contusion w/moderate (1-24 hrs) LOC                                                          | Penetrating | Mod/Sev |
| 801.64 | open fracture of base of skull with cerebral laceration and contusion w/prolonged (>24 hrs) LOC and return to pre-existing conscious level               | Penetrating | Mod/Sev |
| 801.65 | open fracture of base of skull with cerebral laceration and contusion w/prolonged (>24 hrs) LOC w/o return to pre-existing conscious level               | Penetrating | Mod/Sev |
| 801.66 | open fracture of base of skull with cerebral laceration and contusion w/LOC of unspecified duration                                                      | Penetrating | Mod/Sev |
| 801.69 | open fracture of base of skull with cerebral laceration and contusion w/concussion unspecified                                                           | Penetrating | Mod/Sev |
| 801.7  | <b>open fracture of base of skull with subarachnoid subdural and extradural hemorrhage</b>                                                               | n/a         | n/a     |
| 801.70 | open fracture of base of skull with subarachnoid subdural and extradural hemorrhage w/state of consciousness unspecified                                 | Penetrating | Mod/Sev |
| 801.71 | open fracture of base of skull with subarachnoid subdural and extradural hemorrhage w/o LOC                                                              | Penetrating | Mod/Sev |
| 801.72 | open fracture of base of skull with subarachnoid subdural and extradural hemorrhage w/brief (<1 hr) LOC                                                  | Penetrating | Mod/Sev |
| 801.73 | open fracture of base of skull with subarachnoid subdural and extradural hemorrhage w/moderate (1-24 hrs) LOC                                            | Penetrating | Mod/Sev |
| 801.74 | open fracture of base of skull with subarachnoid subdural and extradural hemorrhage w/prolonged (>24 hrs) LOC and return to pre-existing conscious level | Penetrating | Mod/Sev |
| 801.75 | open fracture of base of skull with subarachnoid subdural and extradural hemorrhage w/prolonged (>24 hrs) LOC w/o return to pre-existing conscious level | Penetrating | Mod/Sev |
| 801.76 | open fracture of base of skull with subarachnoid subdural and extradural hemorrhage w/LOC of unspecified duration                                        | Penetrating | Mod/Sev |
| 801.79 | open fracture of base of skull with subarachnoid subdural and extradural hemorrhage w/concussion unspecified                                             | Penetrating | Mod/Sev |
| 801.8  | <b>open fracture of base of skull with other and unspecified intracranial hemorrhage</b>                                                                 | n/a         | n/a     |
| 801.80 | open fracture of base of skull with other and unspecified intracranial hemorrhage w/state of consciousness unspecified                                   | Penetrating | Mod/Sev |
| 801.81 | open fracture of base of skull with other and unspecified intracranial hemorrhage w/o LOC                                                                | Penetrating | Mod/Sev |
| 801.82 | open fracture of base of skull with other and unspecified intracranial hemorrhage w/brief (<1 hr) LOC                                                    | Penetrating | Mod/Sev |
| 801.83 | open fracture of base of skull with other and unspecified intracranial hemorrhage w/moderate (1-24 hrs) LOC                                              | Penetrating | Mod/Sev |
| 801.84 | open fracture of base of skull with other and unspecified intracranial hemorrhage w/prolonged (>24 hrs) LOC and return to pre-existing conscious level   | Penetrating | Mod/Sev |
| 801.85 | open fracture of base of skull with other and unspecified intracranial hemorrhage w/prolonged (>24 hrs) LOC w/o return to pre-existing conscious level   | Penetrating | Mod/Sev |
| 801.86 | open fracture of base of skull with other and unspecified intracranial hemorrhage w/LOC of unspecified duration                                          | Penetrating | Mod/Sev |
| 801.89 | open fracture of base of skull with other and unspecified intracranial hemorrhage w/concussion unspecified                                               | Penetrating | Mod/Sev |
| 801.9  | <b>open fracture of base of skull with intracranial injury of other and unspecified nature</b>                                                           | n/a         | n/a     |
| 801.90 | open fracture of base of skull with intracranial injury of other and unspecified nature w/state of consciousness unspecified                             | Penetrating | Mod/Sev |
| 801.91 | open fracture of base of skull with intracranial injury of other and unspecified nature w/o LOC                                                          | Penetrating | Mod/Sev |



|        |                                                                                                                                                              |             |                   |
|--------|--------------------------------------------------------------------------------------------------------------------------------------------------------------|-------------|-------------------|
| 801.92 | open fracture of base of skull with intracranial injury of other and unspecified nature w/brief (<1 hr) LOC                                                  | Penetrating | Mod/Sev           |
| 801.93 | open fracture of base of skull with intracranial injury of other and unspecified nature w/moderate (1-24 hrs) LOC                                            | Penetrating | Mod/Sev           |
| 801.94 | open fracture of base of skull with intracranial injury of other and unspecified nature w/prolonged (>24 hrs) LOC and return to pre-existing conscious level | Penetrating | Mod/Sev           |
| 801.95 | open fracture of base of skull with intracranial injury of other and unspecified nature w/prolonged (>24 hrs) LOC w/o return to pre-existing conscious level | Penetrating | Mod/Sev           |
| 801.96 | open fracture of base of skull with intracranial injury of other and unspecified nature w/LOC of unspecified duration                                        | Penetrating | Mod/Sev           |
| 801.99 | open fracture of base of skull with intracranial injury of other and unspecified nature w/concussion unspecified                                             | Penetrating | Mod/Sev           |
| 803.0  | <b>other closed skull fracture w/o mention of intracranial injury</b>                                                                                        | n/a         | n/a               |
| 803.00 | other closed skull fracture w/o mention of intracranial injury w/state of consciousness unspecified                                                          | Mild        | Mild, LOC unknown |
| 803.01 | other closed skull fracture w/o mention of intracranial injury w/o LOC                                                                                       | Mild        | Mild, no LOC      |
| 803.02 | other closed skull fracture w/o mention of intracranial injury w/brief (<1 hr) LOC                                                                           | Mild        | Mild, LOC         |
| 803.03 | other closed skull fracture w/o mention of intracranial injury w/moderate (1-24 hrs) LOC                                                                     | Moderate    | Mod/Sev           |
| 803.04 | other closed skull fracture w/o mention of intracranial injury w/prolonged (>24 hrs) LOC and return to pre-existing conscious level                          | Severe      | Mod/Sev           |
| 803.05 | other closed skull fracture w/o mention of intracranial injury w/prolonged (>24 hrs) LOC w/o return to pre-existing conscious level                          | Severe      | Mod/Sev           |
| 803.06 | other closed skull fracture w/o mention of intracranial injury w/LOC of unspecified duration                                                                 | Mild        | Mild, LOC         |
| 803.09 | other closed skull fracture w/o mention of intracranial injury w/concussion unspecified                                                                      | Mild        | Mild, LOC unknown |
| 803.1  | <b>other closed skull fracture with cerebral laceration and contusion</b>                                                                                    | n/a         | n/a               |
| 803.10 | other closed skull fracture with cerebral laceration and contusion w/state of consciousness unspecified                                                      | Moderate    | Mod/Sev           |
| 803.11 | other closed skull fracture with cerebral laceration and contusion w/o LOC                                                                                   | Moderate    | Mod/Sev           |
| 803.12 | other closed skull fracture with cerebral laceration and contusion w/brief (<1 hr) LOC                                                                       | Moderate    | Mod/Sev           |
| 803.13 | other closed skull fracture with cerebral laceration and contusion w/moderate (1-24 hrs) LOC                                                                 | Moderate    | Mod/Sev           |
| 803.14 | other closed skull fracture with cerebral laceration and contusion w/prolonged (>24 hrs) LOC and return to pre-existing conscious level                      | Severe      | Mod/Sev           |
| 803.15 | other closed skull fracture with cerebral laceration and contusion w/prolonged (>24 hrs) LOC w/o return to pre-existing conscious level                      | Severe      | Mod/Sev           |
| 803.16 | other closed skull fracture with cerebral laceration and contusion w/LOC of unspecified duration                                                             | Moderate    | Mod/Sev           |
| 803.19 | other closed skull fracture with cerebral laceration and contusion w/concussion unspecified                                                                  | Moderate    | Mod/Sev           |
| 803.2  | <b>other closed skull fracture with subarachnoid subdural and extradural hemorrhage</b>                                                                      | n/a         | n/a               |
| 803.20 | other closed skull fracture with subarachnoid subdural and extradural hemorrhage w/state of consciousness unspecified                                        | Moderate    | Mod/Sev           |
| 803.21 | other closed skull fracture with subarachnoid subdural and extradural hemorrhage w/o LOC                                                                     | Moderate    | Mod/Sev           |
| 803.22 | other closed skull fracture with subarachnoid subdural and extradural hemorrhage w/brief (<1 hr) LOC                                                         | Moderate    | Mod/Sev           |
| 803.23 | other closed skull fracture with subarachnoid subdural and extradural hemorrhage w/moderate (1-24 hrs) LOC                                                   | Moderate    | Mod/Sev           |
| 803.24 | other closed skull fracture with subarachnoid subdural and extradural hemorrhage w/prolonged (>24 hrs) LOC and return to pre-existing conscious level        | Severe      | Mod/Sev           |
| 803.25 | other closed skull fracture with subarachnoid subdural and extradural hemorrhage w/prolonged (>24 hrs) LOC w/o return to pre-existing conscious level        | Severe      | Mod/Sev           |

|        |                                                                                                                                                           |             |                   |
|--------|-----------------------------------------------------------------------------------------------------------------------------------------------------------|-------------|-------------------|
| 803.26 | other closed skull fracture with subarachnoid subdural and extradural hemorrhage w/LOC of unspecified duration                                            | Moderate    | Mod/Sev           |
| 803.29 | other closed skull fracture with subarachnoid subdural and extradural hemorrhage w/concussion unspecified                                                 | Moderate    | Mod/Sev           |
| 803.3  | closed skull fracture with other and unspecified intracranial hemorrhage                                                                                  | n/a         | n/a               |
| 803.30 | closed skull fracture with other and unspecified intracranial hemorrhage w/state of Unconsciousness Unspecified                                           | Moderate    | Mod/Sev           |
| 803.31 | closed skull fracture with other and unspecified intracranial hemorrhage w/o LOC                                                                          | Moderate    | Mod/Sev           |
| 803.32 | closed skull fracture with other and unspecified intracranial hemorrhage w/brief (<1 hr) LOC                                                              | Moderate    | Mod/Sev           |
| 803.33 | closed skull fracture with other and unspecified intracranial hemorrhage w/moderate (1-24 hrs) LOC                                                        | Moderate    | Mod/Sev           |
| 803.34 | closed skull fracture with other and unspecified intracranial hemorrhage w/prolonged (>24 hrs) LOC and return to pre-existing conscious level             | Severe      | Mod/Sev           |
| 803.35 | closed skull fracture with other and unspecified intracranial hemorrhage w/prolonged (>24 hrs) LOC w/o return to pre-existing conscious level             | Severe      | Mod/Sev           |
| 803.36 | closed skull fracture with other and unspecified intracranial hemorrhage w/LOC of unspecified duration                                                    | Moderate    | Mod/Sev           |
| 803.39 | closed skull fracture with other and unspecified intracranial hemorrhage w/concussion unspecified                                                         | Moderate    | Mod/Sev           |
| 803.4  | <b>other closed skull fracture with intracranial injury of other and unspecified nature</b>                                                               | n/a         | n/a               |
| 803.40 | other closed skull fracture with intracranial injury of other and unspecified nature w/state of consciousness unspecified                                 | Moderate    | Mod/Sev           |
| 803.41 | other closed skull fracture with intracranial injury of other and unspecified nature w/o LOC                                                              | Moderate    | Mod/Sev           |
| 803.42 | other closed skull fracture with intracranial injury of other and unspecified nature w/brief (<1 hr) LOC                                                  | Moderate    | Mod/Sev           |
| 803.43 | other closed skull fracture with intracranial injury of other and unspecified nature w/moderate (1-24 hrs) LOC                                            | Moderate    | Mod/Sev           |
| 803.44 | other closed skull fracture with intracranial injury of other and unspecified nature w/prolonged (>24 hrs) LOC and return to pre-existing conscious level | Severe      | Mod/Sev           |
| 803.45 | other closed skull fracture with intracranial injury of other and unspecified nature w/prolonged (>24 hrs) LOC w/o return to pre-existing conscious level | Severe      | Mod/Sev           |
| 803.46 | other closed skull fracture with intracranial injury of other and unspecified nature w/LOC of unspecified duration                                        | Moderate    | Mod/Sev           |
| 803.49 | other closed skull fracture with intracranial injury of other and unspecified nature w/concussion unspecified                                             | Moderate    | Mod/Sev           |
| 803.5  | <b>other open skull fracture w/o mention of intracranial injury</b>                                                                                       | n/a         | n/a               |
| 803.50 | other open skull fracture w/o mention of intracranial injury w/state of consciousness unspecified                                                         | Mild        | Mild, LOC unknown |
| 803.51 | other open skull fracture w/o mention of intracranial injury w/o LOC                                                                                      | Mild        | Mild, no LOC      |
| 803.52 | other open skull fracture w/o mention of intracranial injury w/brief (<1 hr) LOC                                                                          | Mild        | Mild, LOC         |
| 803.53 | other open skull fracture w/o mention of intracranial injury w/moderate (1-24 hrs) LOC                                                                    | Moderate    | Mod/Sev           |
| 803.54 | other open skull fracture w/o mention of intracranial injury w/prolonged (>24 hrs) LOC and return to pre-existing conscious level                         | Severe      | Mod/Sev           |
| 803.55 | other open skull fracture w/o mention of intracranial injury w/prolonged (>24 hrs) LOC w/o return to pre-existing conscious level                         | Severe      | Mod/Sev           |
| 803.56 | other open skull fracture w/o mention of intracranial injury w/LOC of unspecified duration                                                                | Moderate    | Mod/Sev           |
| 803.59 | other open skull fracture w/o mention of intracranial injury w/concussion unspecified                                                                     | Moderate    | Mod/Sev           |
| 803.6  | <b>other open skull fracture with cerebral laceration and contusion</b>                                                                                   | n/a         | n/a               |
| 803.60 | other open skull fracture with cerebral laceration and contusion w/state of consciousness unspecified                                                     | Penetrating | Mod/Sev           |
| 803.61 | other open skull fracture with cerebral laceration and contusion w/o LOC                                                                                  | Penetrating | Mod/Sev           |
| 803.62 | other open skull fracture with cerebral laceration and contusion w/brief (<1                                                                              | Penetrating | Mod/Sev           |

|        |                                                                                                                                                         |             |         |
|--------|---------------------------------------------------------------------------------------------------------------------------------------------------------|-------------|---------|
|        | hr) LOC                                                                                                                                                 |             |         |
| 803.63 | other open skull fracture with cerebral laceration and contusion w/moderate (1-24 hrs) LOC                                                              | Penetrating | Mod/Sev |
| 803.64 | other open skull fracture with cerebral laceration and contusion w/prolonged (>24 hrs) LOC and return to pre-existing conscious level                   | Penetrating | Mod/Sev |
| 803.65 | other open skull fracture with cerebral laceration and contusion w/prolonged (>24 hrs) LOC w/o return to pre-existing conscious level                   | Penetrating | Mod/Sev |
| 803.66 | other open skull fracture with cerebral laceration and contusion w/LOC of unspecified duration                                                          | Penetrating | Mod/Sev |
| 803.69 | other open skull fracture with cerebral laceration and contusion w/concussion unspecified                                                               | Penetrating | Mod/Sev |
| 803.7  | <b>other open skull fracture with subarachnoid subdural and extradural hemorrhage</b>                                                                   | n/a         | n/a     |
| 803.70 | other open skull fracture with subarachnoid subdural and extradural hemorrhage w/state of consciousness unspecified                                     | Penetrating | Mod/Sev |
| 803.71 | other open skull fracture with subarachnoid subdural and extradural hemorrhage w/o LOC                                                                  | Penetrating | Mod/Sev |
| 803.72 | other open skull fracture with subarachnoid subdural and extradural hemorrhage w/brief (<1 hr) LOC                                                      | Penetrating | Mod/Sev |
| 803.73 | other open skull fracture with subarachnoid subdural and extradural hemorrhage w/moderate (1-24 hrs) LOC                                                | Penetrating | Mod/Sev |
| 803.74 | other open skull fracture with subarachnoid subdural and extradural hemorrhage w/prolonged (>24 hrs) LOC and return to pre-existing conscious level     | Penetrating | Mod/Sev |
| 803.75 | other open skull fracture with subarachnoid subdural and extradural hemorrhage w/prolonged (>24 hrs) LOC w/o return to pre-existing conscious level     | Penetrating | Mod/Sev |
| 803.76 | other open skull fracture with subarachnoid subdural and extradural hemorrhage w/LOC of unspecified duration                                            | Penetrating | Mod/Sev |
| 803.79 | other open skull fracture with subarachnoid subdural and extradural hemorrhage w/concussion unspecified                                                 | Penetrating | Mod/Sev |
| 803.8  | <b>other open skull fracture with other and unspecified intracranial hemorrhage</b>                                                                     | n/a         | n/a     |
| 803.80 | other open skull fracture with other and unspecified intracranial hemorrhage w/state of consciousness unspecified                                       | Penetrating | Mod/Sev |
| 803.81 | other open skull fracture with other and unspecified intracranial hemorrhage w/o LOC                                                                    | Penetrating | Mod/Sev |
| 803.82 | other open skull fracture with other and unspecified intracranial hemorrhage w/brief (<1 hr) LOC                                                        | Penetrating | Mod/Sev |
| 803.83 | other open skull fracture with other and unspecified intracranial hemorrhage w/moderate (1-24 hrs) LOC                                                  | Penetrating | Mod/Sev |
| 803.84 | other open skull fracture with other and unspecified intracranial hemorrhage w/prolonged (>24 hrs) LOC and return to pre-existing conscious level       | Penetrating | Mod/Sev |
| 803.85 | other open skull fracture with other and unspecified intracranial hemorrhage w/prolonged (>24 hrs) LOC w/o return to pre-existing conscious level       | Penetrating | Mod/Sev |
| 803.86 | other open skull fracture with other and unspecified intracranial hemorrhage w/LOC of unspecified duration                                              | Penetrating | Mod/Sev |
| 803.89 | other open skull fracture with other and unspecified intracranial hemorrhage w/concussion unspecified                                                   | Penetrating | Mod/Sev |
| 803.9  | <b>other open skull fracture with intracranial injury of other and unspecified nature</b>                                                               | n/a         | n/a     |
| 803.90 | other open skull fracture with intracranial injury of other and unspecified nature w/state of consciousness unspecified                                 | Penetrating | Mod/Sev |
| 803.91 | other open skull fracture with intracranial injury of other and unspecified nature w/o LOC                                                              | Penetrating | Mod/Sev |
| 803.92 | other open skull fracture with intracranial injury of other and unspecified nature w/brief (<1 hr) LOC                                                  | Penetrating | Mod/Sev |
| 803.93 | other open skull fracture with intracranial injury of other and unspecified nature w/moderate (1-24 hrs) LOC                                            | Penetrating | Mod/Sev |
| 803.94 | other open skull fracture with intracranial injury of other and unspecified nature w/prolonged (>24 hrs) LOC and return to pre-existing conscious level | Penetrating | Mod/Sev |

|        |                                                                                                                                                                                     |             |                   |
|--------|-------------------------------------------------------------------------------------------------------------------------------------------------------------------------------------|-------------|-------------------|
| 803.95 | other open skull fracture with intracranial injury of other and unspecified nature w/prolonged (>24 hrs) LOC w/o return to pre-existing conscious level                             | Penetrating | Mod/Sev           |
| 803.96 | other open skull fracture with intracranial injury of other and unspecified nature w/LOC of unspecified duration                                                                    | Penetrating | Mod/Sev           |
| 803.99 | other open skull fracture with intracranial injury of other and unspecified nature w/concussion unspecified                                                                         | Penetrating | Mod/Sev           |
| 804.0  | <b>closed fractures involving skull or face with other bones w/o mention of intracranial injury</b>                                                                                 | n/a         | n/a               |
| 804.00 | closed fractures involving skull or face with other bones, w/o mention of intracranial injury, w/state of consciousness unspecified                                                 | Mild        | Mild, LOC unknown |
| 804.01 | closed fractures involving skull or face with other bones, w/o mention of intracranial injury, w/o LOC                                                                              | Mild        | Mild, no LOC      |
| 804.02 | closed fractures involving skull or face with other bones, w/o mention of intracranial injury, w/brief (<1 hr) LOC                                                                  | Mild        | Mild, LOC         |
| 804.03 | closed fractures involving skull or face with other bones, w/o mention of intracranial injury, w/moderate (1-24 hrs) LOC                                                            | Moderate    | Mod/Sev           |
| 804.04 | closed fractures involving skull or face with other bones, w/o mention of intracranial injury, w/prolonged (>24 hrs) LOC and return to pre-existing conscious level                 | Severe      | Mod/Sev           |
| 804.05 | closed fractures involving skull or face with other bones, w/o mention of intracranial injury, w/prolonged (>24 hrs) LOC w/o return to pre-existing conscious level                 | Severe      | Mod/Sev           |
| 804.06 | closed fractures involving skull or face with other bones, w/o mention of intracranial injury, w/LOC of unspecified duration                                                        | Mild        | Mild, LOC         |
| 804.09 | closed fractures involving skull or face with other bones, w/o mention of intracranial injury, w/concussion unspecified                                                             | Mild        | Mild, LOC unknown |
| 804.1  | <b>closed fractures involving skull or face with other bones with cerebral laceration and contusion</b>                                                                             | n/a         | n/a               |
| 804.10 | closed fractures involving skull or face with other bones with cerebral laceration and contusion w/state of consciousness unspecified                                               | Moderate    | Mod/Sev           |
| 804.11 | closed fractures involving skull or face with other bones with cerebral laceration and contusion w/o LOC                                                                            | Moderate    | Mod/Sev           |
| 804.12 | closed fractures involving skull or face with other bones with cerebral laceration and contusion w/brief (<1 hr) LOC                                                                | Moderate    | Mod/Sev           |
| 804.13 | closed fractures involving skull or face with other bones with cerebral laceration and contusion w/moderate (1-24 hrs) LOC                                                          | Moderate    | Mod/Sev           |
| 804.14 | closed fractures involving skull or face with other bones with cerebral laceration and contusion w/prolonged (>24 hrs) LOC and return to pre-existing conscious level               | Severe      | Mod/Sev           |
| 804.15 | closed fractures involving skull or face with other bones with cerebral laceration and contusion w/prolonged (>24 hrs) LOC w/o return to pre-existing conscious level               | Severe      | Mod/Sev           |
| 804.16 | closed fractures involving skull or face with other bones with cerebral laceration and contusion w/LOC of unspecified duration                                                      | Moderate    | Mod/Sev           |
| 804.19 | closed fractures involving skull or face with other bones with cerebral laceration and contusion w/concussion unspecified                                                           | Moderate    | Mod/Sev           |
| 804.2  | <b>closed fractures involving skull or face with other bones with subarachnoid subdural and extradural hemorrhage</b>                                                               | n/a         | n/a               |
| 804.20 | closed fractures involving skull or face with other bones with subarachnoid subdural and extradural hemorrhage w/state of consciousness unspecified                                 | Moderate    | Mod/Sev           |
| 804.21 | closed fractures involving skull or face with other bones with subarachnoid subdural and extradural hemorrhage w/o LOC                                                              | Moderate    | Mod/Sev           |
| 804.22 | closed fractures involving skull or face with other bones with subarachnoid subdural and extradural hemorrhage w/brief (<1 hr) LOC                                                  | Moderate    | Mod/Sev           |
| 804.23 | closed fractures involving skull or face with other bones with subarachnoid subdural and extradural hemorrhage w/moderate (1-24 hrs) LOC                                            | Moderate    | Mod/Sev           |
| 804.24 | closed fractures involving skull or face with other bones with subarachnoid subdural and extradural hemorrhage w/prolonged (>24 hrs) LOC and return to pre-existing conscious level | Severe      | Mod/Sev           |
| 804.25 | closed fractures involving skull or face with other bones with subarachnoid subdural and extradural hemorrhage w/prolonged (>24 hrs) LOC w/o return                                 | Severe      | Mod/Sev           |

|        |                                                                                                                                                                                         |          |                   |
|--------|-----------------------------------------------------------------------------------------------------------------------------------------------------------------------------------------|----------|-------------------|
|        | to pre-existing conscious level                                                                                                                                                         |          |                   |
| 804.26 | closed fractures involving skull or face with other bones with subarachnoid subdural and extradural hemorrhage w/LOC of unspecified duration                                            | Moderate | Mod/Sev           |
| 804.29 | closed fractures involving skull or face with other bones with subarachnoid subdural and extradural hemorrhage w/concussion unspecified                                                 | Moderate | Mod/Sev           |
| 804.3  | <b>closed fractures involving skull or face with other bones with other and unspecified intracranial hemorrhage</b>                                                                     | n/a      | n/a               |
| 804.30 | closed fractures involving skull or face with other bones with other and unspecified intracranial hemorrhage w/state of consciousness unspecified                                       | Moderate | Mod/Sev           |
| 804.31 | closed fractures involving skull or face with other bones with other and unspecified intracranial hemorrhage w/o LOC                                                                    | Moderate | Mod/Sev           |
| 804.32 | closed fractures involving skull or face with other bones with other and unspecified intracranial hemorrhage w/brief (<1 hr) LOC                                                        | Moderate | Mod/Sev           |
| 804.33 | closed fractures involving skull or face with other bones with other and unspecified intracranial hemorrhage w/moderate (1-24 hrs) LOC                                                  | Moderate | Mod/Sev           |
| 804.34 | closed fractures involving skull or face with other bones with other and unspecified intracranial hemorrhage w/prolonged (>24 hrs) LOC and Return To Pre- Existing Conscious Level      | Severe   | Mod/Sev           |
| 804.35 | closed fractures involving skull or face with other bones with other and unspecified intracranial hemorrhage w/prolonged (>24 hrs) LOC w/o return to pre-existing conscious level       | Severe   | Mod/Sev           |
| 804.36 | closed fractures involving skull or face with other bones with other and unspecified intracranial hemorrhage w/LOC of unspecified duration                                              | Moderate | Mod/Sev           |
| 804.39 | closed fractures involving skull or face with other bones with other and unspecified intracranial hemorrhage w/concussion unspecified                                                   | Moderate | Mod/Sev           |
| 804.4  | <b>closed fractures involving skull or face with other bones with intracranial injury of other and unspecified nature</b>                                                               | n/a      | n/a               |
| 804.40 | closed fractures involving skull or face with other bones with intracranial injury of other and unspecified nature w/state of consciousness unspecified                                 | Moderate | Mod/Sev           |
| 804.41 | closed fractures involving skull or face with other bones with intracranial injury of other and unspecified nature w/o LOC                                                              | Moderate | Mod/Sev           |
| 804.42 | closed fractures involving skull or face with other bones with intracranial injury of other and unspecified nature w/brief (<1 hr) LOC                                                  | Moderate | Mod/Sev           |
| 804.43 | closed fractures involving skull or face with other bones with intracranial injury of other and unspecified nature w/moderate (1-24 hrs) LOC                                            | Moderate | Mod/Sev           |
| 804.44 | closed fractures involving skull or face with other bones with intracranial injury of other and unspecified nature w/prolonged (>24 hrs) LOC and return to pre-existing conscious level | Severe   | Mod/Sev           |
| 804.45 | closed fractures involving skull or face with other bones with intracranial injury of other and unspecified nature w/prolonged (>24 hrs) LOC w/o return to pre-existing conscious level | Severe   | Mod/Sev           |
| 804.46 | closed fractures involving skull or face with other bones with intracranial injury of other and unspecified nature w/LOC of unspecified duration                                        | Moderate | Mod/Sev           |
| 804.49 | closed fractures involving skull or face with other bones with intracranial injury of other and unspecified nature w/concussion unspecified                                             | Moderate | Mod/Sev           |
| 804.5  | <b>open fractures involving skull or face with other bones w/o mention of intracranial injury</b>                                                                                       | n/a      | n/a               |
| 804.50 | open fractures involving skull or face with other bones w/o mention of intracranial injury w/state of consciousness unspecified                                                         | Mild     | Mild, LOC unknown |
| 804.51 | open fractures involving skull or face with other bones w/o mention of intracranial injury w/o LOC                                                                                      | Mild     | Mild, no LOC      |
| 804.52 | open fractures involving skull or face with other bones w/o mention of intracranial injury w/brief (<1 hr) LOC                                                                          | Mild     | Mild, LOC         |
| 804.53 | open fractures involving skull or face with other bones w/o mention of intracranial injury w/moderate (1-24 hrs) LOC                                                                    | Moderate | Mod/Sev           |
| 804.54 | open fractures involving skull or face with other bones w/o mention of intracranial injury w/prolonged (>24 hrs) LOC and return to pre-existing conscious level                         | Severe   | Mod/Sev           |
| 804.55 | open fractures involving skull or face with other bones w/o mention of intracranial injury w/prolonged (>24 hrs) LOC w/o return to pre-existing conscious level                         | Severe   | Mod/Sev           |

|        |                                                                                                                                                                                                |             |         |
|--------|------------------------------------------------------------------------------------------------------------------------------------------------------------------------------------------------|-------------|---------|
| 804.56 | open fractures involving skull or face with other bones w/o mention of intracranial injury w/LOC of unspecified duration                                                                       | Moderate    | Mod/Sev |
| 804.59 | open fractures involving skull or face with other bones w/o mention of intracranial injury w/concussion unspecified                                                                            | Moderate    | Mod/Sev |
| 804.6  | <b>open fractures involving skull or face with other bones with cerebral laceration and contusion</b>                                                                                          | n/a         | n/a     |
| 804.60 | open fractures involving skull or face with other bones with cerebral laceration and contusion w/state of consciousness unspecified                                                            | Penetrating | Mod/Sev |
| 804.61 | open fractures involving skull or face with other bones with cerebral laceration and contusion w/o LOC                                                                                         | Penetrating | Mod/Sev |
| 804.62 | open fractures involving skull or face with other bones with cerebral laceration and contusion w/brief (<1 hr) LOC                                                                             | Penetrating | Mod/Sev |
| 804.63 | open fractures involving skull or face with other bones with cerebral laceration and contusion w/moderate (1-24 hrs) LOC                                                                       | Penetrating | Mod/Sev |
| 804.64 | open fractures involving skull or face with other bones with cerebral laceration and contusion w/prolonged (>24 hrs) LOC and return to pre-existing conscious level                            | Penetrating | Mod/Sev |
| 804.65 | open fractures involving skull or face with other bones with cerebral laceration and contusion w/prolonged (>24 hrs) LOC w/o return to pre-existing conscious level                            | Penetrating | Mod/Sev |
| 804.66 | open fractures involving skull or face with other bones with cerebral laceration and contusion w/LOC of unspecified duration                                                                   | Penetrating | Mod/Sev |
| 804.69 | open fractures involving skull or face with other bones with cerebral laceration and contusion w/concussion unspecified                                                                        | Penetrating | Mod/Sev |
| 804.7  | <b>open fractures involving skull or face with other bones with subarachnoid subdural and extradural hemorrhage</b>                                                                            | n/a         | n/a     |
| 804.70 | open fractures involving skull or face with other bones with subarachnoid subdural and extradural hemorrhage w/state of consciousness unspecified                                              | Penetrating | Mod/Sev |
| 804.71 | open fractures involving skull or face with other bones with subarachnoid subdural and extradural hemorrhage w/o LOC                                                                           | Penetrating | Mod/Sev |
| 804.72 | open fractures involving skull or face with other bones with subarachnoid subdural and extradural hemorrhage w/brief (<1 hr) LOC                                                               | Penetrating | Mod/Sev |
| 804.73 | open fractures involving skull or face with other bones with subarachnoid subdural and extradural hemorrhage w/moderate (1-24 hrs) LOC                                                         | Penetrating | Mod/Sev |
| 804.74 | open fractures involving skull or face with other bones with subarachnoid subdural and extradural hemorrhage w/prolonged (>24 hrs) LOC and return to pre-existing conscious level              | Penetrating | Mod/Sev |
| 804.75 | open fractures involving skull or face with other bones with subarachnoid subdural and extradural hemorrhage w/prolonged (>24 hrs) LOC w/o return to pre-existing conscious level              | Penetrating | Mod/Sev |
| 804.76 | open fractures involving skull or face with other bones with subarachnoid subdural and extradural hemorrhage w/LOC of unspecified duration                                                     | Penetrating | Mod/Sev |
| 804.79 | open fractures involving skull or face with other bones with subarachnoid subdural and extradural hemorrhage w/concussion unspecified                                                          | Penetrating | Mod/Sev |
| 804.8  | <b>open fractures involving skull or face with other bones with other and unspecified intracranial hemorrhage</b>                                                                              | n/a         | n/a     |
| 804.80 | open fractures involving skull or face with other bones with other and unspecified intracranial hemorrhage w/state of consciousness unspecified                                                | Penetrating | Mod/Sev |
| 804.81 | open fractures involving skull or face with other bones with other and unspecified intracranial hemorrhage w/o LOC                                                                             | Penetrating | Mod/Sev |
| 804.82 | open fractures involving skull or face with other bones with other and unspecified intracranial hemorrhage w/brief (<1 hr) LOC                                                                 | Penetrating | Mod/Sev |
| 804.83 | open fractures involving skull or face with other bones with other and unspecified intracranial hemorrhage w/moderate (1-24 hrs) LOC                                                           | Penetrating | Mod/Sev |
| 804.84 | open fractures involving skull or face with other bones with other and unspecified intracranial hemorrhage w/prolonged (>24 hrs) LOC and return to pre-existing conscious level                | Penetrating | Mod/Sev |
| 804.85 | open fractures involving skull or face with other bones with other and unspecified intracranial hemorrhage w/prolonged (>24 hrs) Loss Consciousness w/o return to pre-existing conscious level | Penetrating | Mod/Sev |
| 804.86 | open fractures involving skull or face with other bones with other and unspecified intracranial hemorrhage w/prolonged (>24 hrs) LOC and return to pre-existing conscious level                | Penetrating | Mod/Sev |

|        |                                                                                                                                                                                       |             |                                   |
|--------|---------------------------------------------------------------------------------------------------------------------------------------------------------------------------------------|-------------|-----------------------------------|
|        | unspecified intracranial hemorrhage w/LOC of unspecified duration                                                                                                                     |             |                                   |
| 804.89 | open fractures involving skull or face with other bones with other and unspecified intracranial hemorrhage w/concussion unspecified                                                   | Penetrating | Mod/Sev                           |
| 804.9  | <b>open fractures involving skull or face with other bones with intracranial injury of other and unspecified nature</b>                                                               | n/a         | n/a                               |
| 804.90 | open fractures involving skull or face with other bones with intracranial injury of other and unspecified nature w/state of consciousness unspecified                                 | Penetrating | Mod/Sev                           |
| 804.91 | open fractures involving skull or face with other bones with intracranial injury of other and unspecified nature w/o LOC                                                              | Penetrating | Mod/Sev                           |
| 804.92 | open fractures involving skull or face with other bones with intracranial injury of other and unspecified nature w/brief (<1 hr) LOC                                                  | Penetrating | Mod/Sev                           |
| 804.93 | open fractures involving skull or face with other bones with intracranial injury of other and unspecified nature w/moderate (1-24 hrs) LOC                                            | Penetrating | Mod/Sev                           |
| 804.94 | open fractures involving skull or face with other bones with intracranial injury of other and unspecified nature w/prolonged (>24 hrs) LOC and return to pre-existing conscious level | Penetrating | Mod/Sev                           |
| 804.95 | open fractures involving skull or face with other bones with intracranial injury of other and unspecified nature w/prolonged (>24 hrs) LOC w/o return to pre-existing conscious level | Penetrating | Mod/Sev                           |
| 804.96 | open fractures involving skull or face with other bones with intracranial injury of other and unspecified nature w/LOC of unspecified duration                                        | Penetrating | Mod/Sev                           |
| 804.99 | open fractures involving skull or face with other bones with intracranial injury of other and unspecified nature w/concussion unspecified                                             | Penetrating | Mod/Sev<br>Mild, LOC<br>unknown   |
| 850    | <b>concussion</b>                                                                                                                                                                     | Mild        | Mild, no LOC                      |
| 850.0  | concussion w/o LOC                                                                                                                                                                    | Mild        | Mild, LOC                         |
| 850.1  | concussion w/brief LOC                                                                                                                                                                | Mild        | Mild, LOC                         |
| 850.11 | concussion w/LOC of 30 min or less                                                                                                                                                    | Mild        | Mild, LOC                         |
| 850.12 | concussion w/LOC From 31-59 min                                                                                                                                                       | Moderate    | Mod/Sev                           |
| 850.2  | concussion w/moderate LOC                                                                                                                                                             | Moderate    | Mod/Sev                           |
| 850.3  | concussion w/prolonged LOC and return to pre-existing conscious level                                                                                                                 | Severe      | Mod/Sev                           |
| 850.4  | concussion w/prolonged LOC w/o return to pre-existing conscious level                                                                                                                 | Severe      | Mod/Sev                           |
| 850.5  | concussion w/LOC of unspecified duration                                                                                                                                              | Mild        | Mild, LOC<br>Mild, LOC<br>unknown |
| 850.9  | concussion unspecified                                                                                                                                                                | Mild        | n/a                               |
| 851.0  | <b>cortex (cerebral) contusion w/o mention of open intracranial wound</b>                                                                                                             | n/a         | n/a                               |
| 851.00 | cortex (cerebral) contusion w/o mention of open intracranial wound, state of consciousness unspecified                                                                                | Moderate    | Mod/Sev                           |
| 851.01 | cortex (cerebral) contusion w/o mention of open intracranial wound w/o LOC                                                                                                            | Moderate    | Mod/Sev                           |
| 851.02 | cortex (cerebral) contusion w/o mention of open intracranial wound w/brief (<1 hr) LOC                                                                                                | Moderate    | Mod/Sev                           |
| 851.03 | cortex (cerebral) contusion w/o mention of open intracranial wound w/moderate (1-24 hrs) LOC                                                                                          | Moderate    | Mod/Sev                           |
| 851.04 | cortex (cerebral) contusion w/o mention of open intracranial wound w/prolonged (>24 hrs) LOC and return to pre-existing conscious level                                               | Severe      | Mod/Sev                           |
| 851.05 | cortex (cerebral) contusion w/o mention of open intracranial wound w/prolonged (>24 hrs) LOC w/o return to pre-existing conscious level                                               | Severe      | Mod/Sev                           |
| 851.06 | cortex (cerebral) contusion w/o mention of open intracranial wound w/LOC of unspecified duration                                                                                      | Moderate    | Mod/Sev                           |
| 851.09 | cortex (cerebral) contusion w/o mention of open intracranial wound w/concussion unspecified                                                                                           | Moderate    | Mod/Sev                           |
| 851.1  | <b>cortex (cerebral) contusion with open intracranial wound</b>                                                                                                                       | n/a         | n/a                               |
| 851.10 | cortex (cerebral) contusion with open intracranial wound w/state of consciousness unspecified                                                                                         | Penetrating | Mod/Sev                           |
| 851.11 | cortex (cerebral) contusion with open intracranial wound w/o LOC                                                                                                                      | Penetrating | Mod/Sev                           |
| 851.12 | cortex (cerebral) contusion with open intracranial wound w/brief (<1 hr) LOC                                                                                                          | Penetrating | Mod/Sev                           |
| 851.13 | cortex (cerebral) contusion with open intracranial wound w/moderate (1-24 hrs) LOC                                                                                                    | Penetrating | Mod/Sev                           |
| 851.14 | cortex (cerebral) contusion with open intracranial wound w/prolonged (>24 hrs) LOC                                                                                                    | Penetrating | Mod/Sev                           |

|        |                                                                                                                                                               |             |         |
|--------|---------------------------------------------------------------------------------------------------------------------------------------------------------------|-------------|---------|
|        | hrs) LOC and return to pre-existing conscious level                                                                                                           |             |         |
| 851.15 | cortex (cerebral) contusion with open intracranial wound w/prolonged (>24 hrs) LOC w/o return to pre-existing conscious level                                 | Penetrating | Mod/Sev |
| 851.16 | cortex (cerebral) contusion with open intracranial wound w/LOC of unspecified duration                                                                        | Penetrating | Mod/Sev |
| 851.19 | cortex (cerebral) contusion with open intracranial wound w/concussion unspecified                                                                             | Penetrating | Mod/Sev |
| 851.2  | <b>cortex (cerebral) laceration w/o mention of open intracranial wound</b>                                                                                    | n/a         | n/a     |
| 851.20 | cortex (cerebral) laceration w/o mention of open intracranial wound w/state of consciousness unspecified                                                      | Moderate    | Mod/Sev |
| 851.21 | cortex (cerebral) laceration w/o mention of open intracranial wound w/o LOC                                                                                   | Moderate    | Mod/Sev |
| 851.22 | cortex (cerebral) laceration w/o mention of open intracranial wound w/brief (<1 hr) LOC                                                                       | Moderate    | Mod/Sev |
| 851.23 | cortex (cerebral) laceration w/o mention of open intracranial wound w/moderate (1-24 hrs) LOC                                                                 | Moderate    | Mod/Sev |
| 851.24 | cortex (cerebral) laceration w/o mention of open intracranial wound w/prolonged (>24 hrs) LOC and return to pre-existing conscious level                      | Severe      | Mod/Sev |
| 851.25 | cortex (cerebral) laceration w/o mention of open intracranial wound w/prolonged (>24 hrs) LOC w/o return to pre-existing conscious level                      | Severe      | Mod/Sev |
| 851.26 | cortex (cerebral) laceration w/o mention of open intracranial wound w/LOC of unspecified duration                                                             | Moderate    | Mod/Sev |
| 851.29 | cortex (cerebral) laceration w/o mention of open intracranial wound w/concussion unspecified                                                                  | Moderate    | Mod/Sev |
| 851.3  | <b>cortex (derebral) laceration with open intracranial wound</b>                                                                                              | n/a         | n/a     |
| 851.30 | cortex (derebral) laceration with open intracranial wound w/state of consciousness unspecified                                                                | Penetrating | Mod/Sev |
| 851.31 | cortex (derebral) laceration with open intracranial wound w/o LOC                                                                                             | Penetrating | Mod/Sev |
| 851.32 | cortex (derebral) laceration with open intracranial wound w/brief (<1 hr) LOC                                                                                 | Penetrating | Mod/Sev |
| 851.33 | cortex (derebral) laceration with open intracranial wound w/moderate (1-24 hrs) LOC                                                                           | Penetrating | Mod/Sev |
| 851.34 | cortex (derebral) laceration with open intracranial wound w/prolonged (>24 hrs) LOC and return to pre-existing conscious level                                | Penetrating | Mod/Sev |
| 851.35 | cortex (derebral) laceration with open intracranial wound w/prolonged (>24 hrs) LOC w/o return to pre-existing conscious level                                | Penetrating | Mod/Sev |
| 851.36 | cortex (derebral) laceration with open intracranial wound w/LOC of unspecified duration                                                                       | Penetrating | Mod/Sev |
| 851.39 | cortex (derebral) laceration with open intracranial wound w/concussion unspecified                                                                            | Penetrating | Mod/Sev |
| 851.4  | <b>cerebellar or brain stem contusion w/o mention of open intracranial wound</b>                                                                              | n/a         | n/a     |
| 851.40 | cerebellar or brain stem contusion w/o mention of open intracranial wound w/state of consciousness unspecified                                                | Moderate    | Mod/Sev |
| 851.41 | cerebellar or brain stem contusion w/o mention of open intracranial wound w/o LOC                                                                             | Moderate    | Mod/Sev |
| 851.42 | cerebellar or brain stem contusion w/o mention of open intracranial wound w/brief (<1 hr) LOC                                                                 | Moderate    | Mod/Sev |
| 851.43 | cerebellar or brain stem contusion w/o mention of open intracranial wound w/moderate (1-24 hrs) LOC                                                           | Moderate    | Mod/Sev |
| 851.44 | cerebellar or brain stem contusion w/o mention of open intracranial wound w/prolonged (>24 hrs) Loss Consciousness and return to pre-existing conscious level | Severe      | Mod/Sev |
| 851.45 | cerebellar or brain stem contusion w/o mention of open intracranial wound w/prolonged (>24 hrs) LOC w/o return to pre-existing conscious level                | Severe      | Mod/Sev |
| 851.46 | cerebellar or brain stem contusion w/o mention of open intracranial wound w/LOC of unspecified duration                                                       | Moderate    | Mod/Sev |
| 851.49 | cerebellar or brain stem contusion w/o mention of open intracranial wound w/concussion unspecified                                                            | Moderate    | Mod/Sev |
| 851.5  | <b>cerebellar or brain stem contusion with open intracranial wound</b>                                                                                        | n/a         | n/a     |
| 851.50 | cerebellar or brain stem contusion with open intracranial wound w/state of                                                                                    | Penetrating | Mod/Sev |



|        |                                                                                                                                                      |             |         |
|--------|------------------------------------------------------------------------------------------------------------------------------------------------------|-------------|---------|
|        | consciousness unspecified                                                                                                                            |             |         |
| 851.51 | cerebellar or brain stem contusion with open intracranial wound w/o LOC                                                                              | Penetrating | Mod/Sev |
| 851.52 | cerebellar or brain stem contusion with open intracranial wound w/brief (<1 hr) LOC                                                                  | Penetrating | Mod/Sev |
| 851.53 | cerebellar or brain stem contusion with open intracranial wound w/moderate (1-24 hrs) LOC                                                            | Penetrating | Mod/Sev |
| 851.54 | cerebellar or brain stem contusion with open intracranial wound w/prolonged (>24 hrs) LOC and return to pre-existing conscious level                 | Penetrating | Mod/Sev |
| 851.55 | cerebellar or brain stem contusion with open intracranial wound w/prolonged (>24 hrs) LOC w/o return to pre-existing conscious level                 | Penetrating | Mod/Sev |
| 851.56 | cerebellar or brain stem contusion with open intracranial wound w/LOC of unspecified duration                                                        | Penetrating | Mod/Sev |
| 851.59 | cerebellar or brain stem contusion with open intracranial wound w/concussion unspecified                                                             | Penetrating | Mod/Sev |
| 851.6  | <b>cerebellar or brain stem laceration w/o mention of open intracranial wound</b>                                                                    | n/a         | n/a     |
| 851.60 | cerebellar or brain stem laceration w/o mention of open intracranial wound w/state of consciousness unspecified                                      | Moderate    | Mod/Sev |
| 851.61 | cerebellar or brain stem laceration w/o mention of open intracranial wound w/o LOC                                                                   | Moderate    | Mod/Sev |
| 851.62 | cerebellar or brain stem laceration w/o mention of open intracranial wound w/brief (Less Than 1 Hour) LOC                                            | Moderate    | Mod/Sev |
| 851.63 | cerebellar or brain stem laceration w/o mention of open intracranial wound w/moderate (1-24 hrs) LOC                                                 | Moderate    | Mod/Sev |
| 851.64 | cerebellar or brain stem laceration w/o mention of open intracranial wound w/prolonged (>24 hrs) LOC and return to pre-existing conscious level      | Severe      | Mod/Sev |
| 851.65 | cerebellar or brain stem laceration w/o mention of open intracranial wound w/prolonged (>24 hrs) LOC w/o return to pre-existing conscious level      | Severe      | Mod/Sev |
| 851.66 | cerebellar or brain stem laceration w/o mention of open intracranial wound w/LOC of unspecified duration                                             | Moderate    | Mod/Sev |
| 851.69 | cerebellar or brain stem laceration w/o mention of open intracranial wound w/concussion unspecified                                                  | Moderate    | Mod/Sev |
| 851.7  | <b>cerebellar or brain stem laceration with open intracranial wound</b>                                                                              | n/a         | n/a     |
| 851.70 | cerebellar or brain stem laceration with open intracranial wound w/state of consciousness unspecified                                                | Penetrating | Mod/Sev |
| 851.71 | cerebellar or brain stem laceration with open intracranial wound w/o LOC                                                                             | Penetrating | Mod/Sev |
| 851.72 | cerebellar or brain stem laceration with open intracranial wound w/brief (<1 hr) LOC                                                                 | Penetrating | Mod/Sev |
| 851.73 | cerebellar or brain stem laceration with open intracranial wound w/moderate (1-24 hrs) LOC                                                           | Penetrating | Mod/Sev |
| 851.74 | cerebellar or brain stem laceration with open intracranial wound w/prolonged (>24 hrs) LOC and return to pre-existing conscious level                | Penetrating | Mod/Sev |
| 851.75 | cerebellar or brain stem laceration with open intracranial wound w/prolonged (>24 hrs) LOC w/o return to pre-existing conscious level                | Penetrating | Mod/Sev |
| 851.76 | cerebellar or brain stem laceration with open intracranial wound w/LOC of unspecified duration                                                       | Penetrating | Mod/Sev |
| 851.79 | cerebellar or brain stem laceration with open intracranial wound w/concussion unspecified                                                            | Penetrating | Mod/Sev |
| 851.8  | <b>other and unspecified cerebral laceration and contusion w/o mention of open intracranial wound</b>                                                | n/a         | n/a     |
| 851.80 | other and unspecified cerebral laceration and contusion w/o mention of open intracranial wound w/state of consciousness unspecified                  | Moderate    | Mod/Sev |
| 851.81 | other and unspecified cerebral laceration and contusion w/o mention of open intracranial wound w/o LOC                                               | Moderate    | Mod/Sev |
| 851.82 | other and unspecified cerebral laceration and contusion w/o mention of open intracranial wound w/brief (<1 hr) LOC                                   | Moderate    | Mod/Sev |
| 851.83 | other and unspecified cerebral laceration and contusion w/o mention of open intracranial wound w/moderate (1-24 hrs) LOC                             | Moderate    | Mod/Sev |
| 851.84 | other and unspecified cerebral laceration and contusion w/o mention of open intracranial wound w/prolonged (>24 hrs) LOC and Return To Pre- Existing | Severe      | Mod/Sev |

|        |                                                                                                                                                                     |             |         |
|--------|---------------------------------------------------------------------------------------------------------------------------------------------------------------------|-------------|---------|
|        | Conscious Level                                                                                                                                                     |             |         |
| 851.85 | other and unspecified cerebral laceration and contusion w/o mention of open intracranial wound w/prolonged (>24 hrs) LOC w/o return to pre-existing conscious level | Severe      | Mod/Sev |
| 851.86 | other and unspecified cerebral laceration and contusion w/o mention of open intracranial wound w/LOC of unspecified duration                                        | Moderate    | Mod/Sev |
| 851.89 | other and unspecified cerebral laceration and contusion w/o mention of open intracranial wound w/concussion unspecified                                             | Moderate    | Mod/Sev |
| 851.9  | <b>other and unspecified cerebral laceration and contusion with open intracranial wound</b>                                                                         | n/a         | n/a     |
| 851.90 | other and unspecified cerebral laceration and contusion with open intracranial wound w/state of consciousness unspecified                                           | Penetrating | Mod/Sev |
| 851.91 | other and unspecified cerebral laceration and contusion with open intracranial wound w/o LOC                                                                        | Penetrating | Mod/Sev |
| 851.92 | other and unspecified cerebral laceration and contusion with open intracranial wound w/brief (<1 hr) LOC                                                            | Penetrating | Mod/Sev |
| 851.93 | other and unspecified cerebral laceration and contusion with open intracranial wound w/moderate (1-24 hrs) LOC                                                      | Penetrating | Mod/Sev |
| 851.94 | other and unspecified cerebral laceration and contusion with open intracranial wound w/prolonged (>24 hrs) LOC and return to pre-existing conscious level           | Penetrating | Mod/Sev |
| 851.95 | other and unspecified cerebral laceration and contusion with open intracranial wound w/prolonged (>24 hrs) LOC w/o return to pre-existing conscious level           | Penetrating | Mod/Sev |
| 851.96 | other and unspecified cerebral laceration and contusion with open intracranial wound w/LOC of unspecified duration                                                  | Penetrating | Mod/Sev |
| 851.99 | other and unspecified cerebral laceration and contusion with open intracranial wound w/concussion unspecified                                                       | Penetrating | Mod/Sev |
| 852.0  | <b>subarachnoid hemorrhage following injury w/o mention of open intracranial wound</b>                                                                              | n/a         | n/a     |
| 852.00 | subarachnoid hemorrhage following injury w/o mention of open intracranial wound w/state of consciousness unspecified                                                | Moderate    | Mod/Sev |
| 852.01 | subarachnoid hemorrhage following injury w/o mention of open intracranial wound w/o LOC                                                                             | Moderate    | Mod/Sev |
| 852.02 | subarachnoid hemorrhage following injury w/o mention of open intracranial wound w/brief (<1 hr) LOC                                                                 | Moderate    | Mod/Sev |
| 852.03 | subarachnoid hemorrhage following injury w/o mention of open intracranial wound w/moderate (1-24 hrs) LOC                                                           | Moderate    | Mod/Sev |
| 852.04 | subarachnoid hemorrhage following injury w/o mention of open intracranial wound w/prolonged (>24 hrs) LOC and return to pre-existing conscious level                | Severe      | Mod/Sev |
| 852.05 | subarachnoid hemorrhage following injury w/o mention of open intracranial wound w/prolonged (>24 hrs) LOC w/o return to pre-existing conscious level                | Severe      | Mod/Sev |
| 852.06 | subarachnoid hemorrhage following injury w/o mention of open intracranial wound w/LOC of unspecified duration                                                       | Moderate    | Mod/Sev |
| 852.09 | subarachnoid hemorrhage following injury w/o mention of open intracranial wound w/concussion unspecified                                                            | Moderate    | Mod/Sev |
| 852.1  | <b>subarachnoid hemorrhage following injury with open intracranial wound</b>                                                                                        | n/a         | n/a     |
| 852.10 | subarachnoid hemorrhage following injury with open intracranial wound w/state of consciousness unspecified                                                          | Penetrating | Mod/Sev |
| 852.11 | subarachnoid hemorrhage following injury with open intracranial wound w/o LOC                                                                                       | Penetrating | Mod/Sev |
| 852.12 | subarachnoid hemorrhage following injury with open intracranial wound w/brief (<1 hr) LOC                                                                           | Penetrating | Mod/Sev |
| 852.13 | subarachnoid hemorrhage following injury with open intracranial wound w/moderate (1-24 hrs) LOC                                                                     | Penetrating | Mod/Sev |
| 852.14 | subarachnoid hemorrhage following injury with open intracranial wound w/prolonged (>24 hrs) LOC and return to pre-existing conscious level                          | Penetrating | Mod/Sev |
| 852.15 | subarachnoid hemorrhage following injury with open intracranial wound w/prolonged (>24 hrs) LOC w/o return to pre-existing conscious level                          | Penetrating | Mod/Sev |
| 852.16 | subarachnoid hemorrhage following injury with open intracranial wound w/LOC of unspecified duration                                                                 | Penetrating | Mod/Sev |
| 852.19 | subarachnoid hemorrhage following injury with open intracranial wound                                                                                               | Penetrating | Mod/Sev |

|        |                                                                                                                                                    |             |         |
|--------|----------------------------------------------------------------------------------------------------------------------------------------------------|-------------|---------|
|        | w/concussion unspecified                                                                                                                           |             |         |
| 852.2  | <b>subdural hemorrhage following injury w/o mention of open intracranial wound</b>                                                                 | n/a         | n/a     |
| 852.20 | subdural hemorrhage following injury w/o mention of open intracranial wound w/state of consciousness unspecified                                   | Moderate    | Mod/Sev |
| 852.21 | subdural hemorrhage following injury w/o mention of open intracranial wound w/o LOC                                                                | Moderate    | Mod/Sev |
| 852.22 | subdural hemorrhage following injury w/o mention of open intracranial wound w/brief (<1 hr) LOC                                                    | Moderate    | Mod/Sev |
| 852.23 | subdural hemorrhage following injury w/o mention of open intracranial wound w/moderate (1-24 hrs) LOC                                              | Moderate    | Mod/Sev |
| 852.24 | subdural hemorrhage following injury w/o mention of open intracranial wound w/prolonged (>24 hrs) LOC and return to pre-existing conscious level   | Severe      | Mod/Sev |
| 852.25 | subdural hemorrhage following injury w/o mention of open intracranial wound w/prolonged (>24 hrs) LOC w/o return to pre-existing conscious level   | Severe      | Mod/Sev |
| 852.26 | subdural hemorrhage following injury w/o mention of open intracranial wound w/LOC of unspecified duration                                          | Moderate    | Mod/Sev |
| 852.29 | subdural hemorrhage following injury w/o mention of open intracranial wound w/concussion unspecified                                               | Moderate    | Mod/Sev |
| 852.3  | <b>subdural hemorrhage following injury with open intracranial wound</b>                                                                           | n/a         | n/a     |
| 852.30 | subdural hemorrhage following injury with open intracranial wound w/state of consciousness unspecified                                             | Penetrating | Mod/Sev |
| 852.31 | subdural hemorrhage following injury with open intracranial wound w/o LOC                                                                          | Penetrating | Mod/Sev |
| 852.32 | subdural hemorrhage following injury with open intracranial wound w/brief (<1 hr) LOC                                                              | Penetrating | Mod/Sev |
| 852.33 | subdural hemorrhage following injury with open intracranial wound w/moderate (1-24 hrs) LOC                                                        | Penetrating | Mod/Sev |
| 852.34 | subdural hemorrhage following injury with open intracranial wound w/prolonged (>24 hrs) LOC and return to pre-existing conscious level             | Penetrating | Mod/Sev |
| 852.35 | subdural hemorrhage following injury with open intracranial wound w/prolonged (>24 hrs) LOC w/o return to pre-existing conscious level             | Penetrating | Mod/Sev |
| 852.36 | subdural hemorrhage following injury with open intracranial wound w/LOC of unspecified duration                                                    | Penetrating | Mod/Sev |
| 852.39 | subdural hemorrhage following injury with open intracranial wound w/concussion unspecified                                                         | Penetrating | Mod/Sev |
| 852.4  | <b>extradural hemorrhage following injury w/o mention of open intracranial wound</b>                                                               | n/a         | n/a     |
| 852.40 | extradural hemorrhage following injury w/o mention of open intracranial wound w/state of consciousness unspecified                                 | Moderate    | Mod/Sev |
| 852.41 | extradural hemorrhage following injury w/o mention of open intracranial wound w/o LOC                                                              | Moderate    | Mod/Sev |
| 852.42 | extradural hemorrhage following injury w/o mention of open intracranial wound w/brief (Less Than 1 Hour) LOC                                       | Moderate    | Mod/Sev |
| 852.43 | extradural hemorrhage following injury w/o mention of open intracranial wound w/moderate (1-24 hrs) LOC                                            | Moderate    | Mod/Sev |
| 852.44 | extradural hemorrhage following injury w/o mention of open intracranial wound w/prolonged (>24 hrs) LOC and return to pre-existing conscious level | Severe      | Mod/Sev |
| 852.45 | extradural hemorrhage following injury w/o mention of open intracranial wound w/prolonged (>24 hrs) LOC w/o return to pre-existing conscious level | Severe      | Mod/Sev |
| 852.46 | extradural hemorrhage following injury w/o mention of open intracranial wound w/LOC of unspecified duration                                        | Moderate    | Mod/Sev |
| 852.49 | extradural hemorrhage following injury w/o mention of open intracranial wound w/concussion unspecified                                             | Moderate    | Mod/Sev |
| 852.5  | <b>extradural hemorrhage following injury with open intracranial wound</b>                                                                         | n/a         | n/a     |
| 852.50 | extradural hemorrhage following injury with open intracranial wound w/state of consciousness unspecified                                           | Penetrating | Mod/Sev |
| 852.51 | extradural hemorrhage following injury with open intracranial wound w/o LOC                                                                        | Penetrating | Mod/Sev |
| 852.52 | extradural hemorrhage following injury with open intracranial wound w/brief (<1 hr) LOC                                                            | Penetrating | Mod/Sev |

|        |                                                                                                                                                                            |             |         |
|--------|----------------------------------------------------------------------------------------------------------------------------------------------------------------------------|-------------|---------|
| 852.53 | extradural hemorrhage following injury with open intracranial wound w/moderate (1-24 hrs) LOC                                                                              | Penetrating | Mod/Sev |
| 852.54 | extradural hemorrhage following injury with open intracranial wound w/prolonged (>24 hrs) LOC and return to pre-existing conscious level                                   | Penetrating | Mod/Sev |
| 852.55 | extradural hemorrhage following injury with open intracranial wound w/prolonged (>24 hrs) LOC w/o return to pre-existing conscious level                                   | Penetrating | Mod/Sev |
| 852.56 | extradural hemorrhage following injury with open intracranial wound w/LOC of unspecified duration                                                                          | Penetrating | Mod/Sev |
| 852.59 | extradural hemorrhage following injury with open intracranial wound w/concussion unspecified                                                                               | Penetrating | Mod/Sev |
| 853.0  | <b>other and unspecified intracranial hemorrhage following injury w/o mention of open intracranial wound</b>                                                               | n/a         | n/a     |
| 853.00 | other and unspecified intracranial hemorrhage following injury w/o mention of open intracranial wound w/state of consciousness unspecified                                 | Moderate    | Mod/Sev |
| 853.01 | other and unspecified intracranial hemorrhage following injury w/o mention of open intracranial wound w/o LOC                                                              | Moderate    | Mod/Sev |
| 853.02 | other and unspecified intracranial hemorrhage following injury w/o mention of open intracranial wound w/brief (<1 hr) LOC                                                  | Moderate    | Mod/Sev |
| 853.03 | other and unspecified intracranial hemorrhage following injury w/o mention of open intracranial wound w/moderate (1-24 hrs) LOC                                            | Moderate    | Mod/Sev |
| 853.04 | other and unspecified intracranial hemorrhage following injury w/o mention of open intracranial wound w/prolonged (>24 hrs) LOC and Return To Pre-Existing Conscious Level | Severe      | Mod/Sev |
| 853.05 | other and unspecified intracranial hemorrhage following injury w/o mention of open Intracranial Wound w/prolonged (>24 hrs) LOC w/o return to pre-existing conscious level | Severe      | Mod/Sev |
| 853.06 | other and unspecified intracranial hemorrhage following injury w/o mention of open intracranial wound w/LOC of unspecified duration                                        | Moderate    | Mod/Sev |
| 853.09 | other and unspecified intracranial hemorrhage following injury w/o mention of open intracranial wound w/concussion unspecified                                             | Moderate    | Mod/Sev |
| 853.1  | <b>other and unspecified intracranial hemorrhage following injury with open intracranial wound</b>                                                                         | n/a         | n/a     |
| 853.10 | other and unspecified intracranial hemorrhage following injury with open intracranial wound w/state of consciousness unspecified                                           | Penetrating | Mod/Sev |
| 853.11 | other and unspecified intracranial hemorrhage following injury with open intracranial wound w/o LOC                                                                        | Penetrating | Mod/Sev |
| 853.12 | other and unspecified intracranial hemorrhage following injury with open intracranial wound w/brief (<1 hr) LOC                                                            | Penetrating | Mod/Sev |
| 853.13 | other and unspecified intracranial hemorrhage following injury with open intracranial wound w/moderate (1-24 hrs) LOC                                                      | Penetrating | Mod/Sev |
| 853.14 | other and unspecified intracranial hemorrhage following injury with open intracranial wound w/prolonged (>24 hrs) LOC and return to pre-existing conscious level           | Penetrating | Mod/Sev |
| 853.15 | other and unspecified intracranial hemorrhage following injury with open intracranial wound w/prolonged (>24 hrs) LOC w/o return to pre-existing conscious level           | Penetrating | Mod/Sev |
| 853.16 | other and unspecified intracranial hemorrhage following injury with open intracranial wound w/LOC of unspecified duration                                                  | Penetrating | Mod/Sev |
| 853.19 | other and unspecified intracranial hemorrhage following injury with open intracranial wound w/concussion unspecified                                                       | Penetrating | Mod/Sev |
| 854.0  | <b>intracranial injury of other and unspecified nature w/o mention of open intracranial wound</b>                                                                          | n/a         | n/a     |
| 854.00 | intracranial injury of other and unspecified nature w/o mention of open intracranial wound w/state of consciousness unspecified                                            | Moderate    | Mod/Sev |
| 854.01 | intracranial injury of other and unspecified nature w/o mention of open intracranial wound w/o LOC                                                                         | Moderate    | Mod/Sev |
| 854.02 | intracranial injury of other and unspecified nature w/o mention of open intracranial wound w/brief (<1 hr) LOC                                                             | Moderate    | Mod/Sev |
| 854.03 | intracranial injury of other and unspecified nature w/o mention of open intracranial wound w/moderate (1-24 hrs) LOC                                                       | Moderate    | Mod/Sev |
| 854.04 | intracranial injury of other and unspecified nature w/o mention of open intracranial wound w/prolonged (>24 hrs) LOC and return to pre-existing conscious level            | Severe      | Mod/Sev |

|          |                                                                                                                                                                 |              |                   |
|----------|-----------------------------------------------------------------------------------------------------------------------------------------------------------------|--------------|-------------------|
|          | intracranial wound w/prolonged (>24 hrs) LOC and return to pre-existing conscious level                                                                         |              |                   |
| 854.05   | intracranial injury of other and unspecified nature w/o mention of open intracranial wound w/prolonged (>24 hrs) LOC w/o return to pre-existing conscious level | Severe       | Mod/Sev           |
| 854.06   | intracranial injury of other and unspecified nature w/o mention of open intracranial wound w/LOC of unspecified duration                                        | Moderate     | Mod/Sev           |
| 854.09   | intracranial injury of other and unspecified nature w/o mention of open intracranial wound w/concussion unspecified                                             | Moderate     | Mod/Sev           |
| 854.1    | <b>Intracranial injury of other and unspecified nature with open Intracranial wound</b>                                                                         | n/a          | n/a               |
| 854.10   | intracranial injury of other and unspecified nature with open Intracranial wound w/state of consciousness unspecified                                           | Penetrating  | Mod/Sev           |
| 854.11   | intracranial injury of other and unspecified nature with open Intracranial wound w/o LOC                                                                        | Penetrating  | Mod/Sev           |
| 854.12   | intracranial injury of other and unspecified nature with open Intracranial wound w/brief (<1 hr) LOC                                                            | Penetrating  | Mod/Sev           |
| 854.13   | intracranial injury of other and unspecified nature with open Intracranial wound w/moderate (1-24 hrs) LOC                                                      | Penetrating  | Mod/Sev           |
| 854.14   | intracranial injury of other and unspecified nature with open Intracranial wound w/prolonged (>24 hrs) LOC and return to pre-existing conscious level           | Penetrating  | Mod/Sev           |
| 854.15   | intracranial injury of other and unspecified nature with open Intracranial wound w/prolonged (>24 hrs) LOC w/o return to pre-existing conscious level           | Penetrating  | Mod/Sev           |
| 854.16   | intracranial injury of other and unspecified nature with open Intracranial wound w/LOC of unspecified duration                                                  | Penetrating  | Mod/Sev           |
| 854.19   | intracranial injury of other and unspecified nature with open Intracranial wound w/concussion unspecified                                                       | Penetrating  | Mod/Sev           |
| 907.0    | <b>late effect of intracranial injury w/o skull fracture</b>                                                                                                    | n/a          | n/a               |
| 950.1    | injury to optic chiasm                                                                                                                                          | Unclassified | Unclassified      |
| 950.2    | injury to optic pathways                                                                                                                                        | Unclassified | Unclassified      |
| 950.3    | injury to visual cortex                                                                                                                                         | Unclassified | Unclassified      |
| 959.01   | other and unspecified injury to head                                                                                                                            | Mild         | Mild, LOC unknown |
| V15.5_1  | personal history of injury presenting hazards to health                                                                                                         | n/a          | n/a               |
| V15.5_F  | personal history of injury presenting hazards to health                                                                                                         | n/a          | n/a               |
| V15.5_E  | personal history of injury presenting hazards to health                                                                                                         | n/a          | n/a               |
| V15.5_D  | personal history of injury presenting hazards to health                                                                                                         | n/a          | n/a               |
| V15.5_C  | personal history of injury presenting hazards to health                                                                                                         | n/a          | n/a               |
| V15.5_B  | personal history of injury presenting hazards to health                                                                                                         | n/a          | n/a               |
| V15.5_A  | personal history of injury presenting hazards to health                                                                                                         | n/a          | n/a               |
| V15.5_9  | personal history of injury presenting hazards to health                                                                                                         | n/a          | n/a               |
| V15.5_8  | personal history of injury presenting hazards to health                                                                                                         | n/a          | n/a               |
| V15.5_7  | personal history of injury presenting hazards to health                                                                                                         | n/a          | n/a               |
| V15.5_6  | personal history of injury presenting hazards to health                                                                                                         | n/a          | n/a               |
| V15.5_5  | personal history of injury presenting hazards to health                                                                                                         | n/a          | n/a               |
| V15.5_4  | personal history of injury presenting hazards to health                                                                                                         | n/a          | n/a               |
| V15.5_3  | personal history of injury presenting hazards to health                                                                                                         | n/a          | n/a               |
| V15.5_2  | personal history of injury presenting hazards to health                                                                                                         | n/a          | n/a               |
| V15.52_0 | personal history of traumatic brain injury                                                                                                                      | n/a          | n/a               |
| V15.52_F | personal history of traumatic brain injury                                                                                                                      | n/a          | n/a               |
| V15.52_E | personal history of traumatic brain injury                                                                                                                      | n/a          | n/a               |
| V15.52_D | personal history of traumatic brain injury                                                                                                                      | n/a          | n/a               |
| V15.52_C | personal history of traumatic brain injury                                                                                                                      | n/a          | n/a               |
| V15.52_B | personal history of traumatic brain injury                                                                                                                      | n/a          | n/a               |
| V15.52_A | personal history of traumatic brain injury                                                                                                                      | n/a          | n/a               |
| V15.52_9 | personal history of traumatic brain injury                                                                                                                      | n/a          | n/a               |
| V15.52_8 | personal history of traumatic brain injury                                                                                                                      | n/a          | n/a               |

|          |                                            |              |              |
|----------|--------------------------------------------|--------------|--------------|
| V15.52_7 | personal history of traumatic brain injury | n/a          | n/a          |
| V15.52_6 | personal history of traumatic brain injury | n/a          | n/a          |
| V15.52_5 | personal history of traumatic brain injury | n/a          | n/a          |
| V15.52_4 | personal history of traumatic brain injury | n/a          | n/a          |
| V15.52_3 | personal history of traumatic brain injury | n/a          | n/a          |
| V15.52_2 | personal history of traumatic brain injury | n/a          | n/a          |
| V15.52_1 | personal history of traumatic brain injury | n/a          | n/a          |
| V15.59_1 | personal history of other injury           | n/a          | n/a          |
| V15.59_F | personal history of other injury           | n/a          | n/a          |
| V15.59_E | personal history of other injury           | n/a          | n/a          |
| V15.59_D | personal history of other injury           | n/a          | n/a          |
| V15.59_C | personal history of other injury           | n/a          | n/a          |
| V15.59_B | personal history of other injury           | n/a          | n/a          |
| V15.59_A | personal history of other injury           | n/a          | n/a          |
| V15.59_9 | personal history of other injury           | n/a          | n/a          |
| V15.59_8 | personal history of other injury           | n/a          | n/a          |
| V15.59_7 | personal history of other injury           | n/a          | n/a          |
| V15.59_6 | personal history of other injury           | n/a          | n/a          |
| V15.59_5 | personal history of other injury           | n/a          | n/a          |
| V15.59_4 | personal history of other injury           | n/a          | n/a          |
| V15.59_3 | personal history of other injury           | n/a          | n/a          |
| V15.59_2 | personal history of other injury           | n/a          | n/a          |
| V15.52   | history of traumatic brain injury          | Unclassified | Unclassified |

\*The following codes were excluded due to inability to classify severity: 907.0, late effects of intracranial injury without skull fracture; 950.X, injury to the optic nerve and pathways; V15.52, personal history of traumatic brain injury.

**eAppendix 3. Dementia ICD-9 Diagnostic Code List**

| <b>ICD-9 Codes</b> | <b>Diagnosis</b>                                                           | <b>FY2016 VHA Dementia Code List (Prevalent Diagnoses)</b> | <b>Modified FY2016 VHA Dementia Code List (Incident Diagnoses)</b> |
|--------------------|----------------------------------------------------------------------------|------------------------------------------------------------|--------------------------------------------------------------------|
| 046.11             | Variant creutzfeldt-jakob disease                                          | X                                                          |                                                                    |
| 046.19             | Other and unspecified creutzfeldt-jakob disease                            | X                                                          |                                                                    |
| 046.3              | Progressive multifocal leukoencephalopathy                                 | X                                                          |                                                                    |
| 046.79             | Prion disease of the CNS/NEC/NOS                                           | X                                                          |                                                                    |
| 290.0              | Senile dementia uncomplicated                                              | X                                                          | X                                                                  |
| 290.10             | Presenile dementia uncomplicated                                           | X                                                          | X                                                                  |
| 290.11             | Presenile dementia with delirium                                           | X                                                          | X                                                                  |
| 290.12             | Presenile dementia with delusional features                                | X                                                          | X                                                                  |
| 290.13             | Presenile dementia with depressive features                                | X                                                          | X                                                                  |
| 290.20             | Senile dementia with delusional features                                   | X                                                          | X                                                                  |
| 290.21             | Senile dementia with depressive features                                   | X                                                          | X                                                                  |
| 290.3              | Senile dementia with delirium                                              | X                                                          | X                                                                  |
| 290.40             | Vascular dementia uncomplicated                                            | X                                                          | X                                                                  |
| 290.41             | Vascular dementia with delirium                                            | X                                                          | X                                                                  |
| 290.42             | Vascular dementia with delusions                                           | X                                                          | X                                                                  |
| 290.43             | Vascular dementia with depressed mood                                      | X                                                          | X                                                                  |
| 291.2              | Alcohol-induced persisting dementia                                        | X                                                          |                                                                    |
| 292.82             | Drug-induced persisting dementia                                           | X                                                          |                                                                    |
| 294.10             | Dementia in conditions classified elsewhere without behavioral disturbance | X                                                          | X                                                                  |
| 294.11             | Dementia in conditions classified elsewhere with behavioral disturbance    | X                                                          | X                                                                  |
| 294.20             | Dementia, unspecified, without behavioral disturbance                      | X                                                          | X                                                                  |
| 294.21             | Dementia, unspecified, with behavioral disturbance                         | X                                                          | X                                                                  |
| 294.8              | Other persistent mental disorders due to conditions classified elsewhere   | X                                                          | X                                                                  |
| 331.0              | Alzheimer's disease                                                        | X                                                          | X                                                                  |
| 331.11             | Pick's disease                                                             | X                                                          | X                                                                  |
| 331.19             | Other frontotemporal dementia                                              | X                                                          | X                                                                  |
| 331.82             | Dementia with lewy bodies                                                  | X                                                          | X                                                                  |

**eTable. Traumatic Brain Injury Case Distribution**

|                       | NPCD only | CTBIE only | Both   | Total   |
|-----------------------|-----------|------------|--------|---------|
| No TBI                | 176,838   | 0          | 1,941  | 178,779 |
| Mild TBI, without LOC | 7,476     | 5,296      | 4,987  | 17,759  |
| Mild TBI, with LOC    | 10,184    | 4,609      | 8,304  | 23,097  |
| Mild TBI, LOC unknown | 55,004    | 0          | 0      | 55,004  |
| Moderate/Severe TBI   | 78,690    | 2,809      | 1,420  | 82,919  |
| Total                 | 328,192   | 12,714     | 16,652 | 357,558 |

CTBIE, Comprehensive Traumatic Brain Injury Evaluation; LOC, loss of consciousness; NPCD, National Patient Care Database; TBI, traumatic brain injury.
